# Supplementary material for: Iron-induced demethoxylation of lignin as an important source for methanol and its oxidation products in the environment
Source: Research Square preprint supplement (doi:10.21203/rs.3.rs-8112407/v1), 2025-11-20
Supplement: Supplementary file 1 [file be04334489f63f1030fd520b.pdf]

## Supplementary Information

### **Iron-induced demethoxylation of lignin as an important source for methanol and its oxidation products in the environment**

**Jonas Hädeler<sup>1\*#</sup>, Gunasekaran Velmurugan<sup>2#</sup>, Rebekka Lauer<sup>1</sup>, Isabel Hanstein<sup>1</sup>, Julia Wenhuda<sup>1</sup>, Rejith Radhamani<sup>2</sup>, Peter Comba<sup>2,3\*</sup> and Frank Keppler<sup>1,4\*</sup>**

<sup>1</sup> Institute of Earth Sciences, Heidelberg University, INF 234-236, D-69120 Heidelberg, Germany

<sup>2</sup> Anorganisch-Chemisches Institut, Heidelberg University, INF 270, D-69120 Heidelberg, Germany

<sup>3</sup> Universität Heidelberg, Interdisciplinary Center for Scientific Computing, INF 205, D-69120 Heidelberg, Germany

<sup>4</sup> Heidelberg Center for the Environment (HCE), Heidelberg University, D-69120 Heidelberg, Germany

\*Correspondence:

Jonas Hädeler: [jonas.haedeler@geow.uni-heidelberg.de](mailto:jonas.haedeler@geow.uni-heidelberg.de)

Peter Comba: [peter.comba@aci.uni-heidelberg.de](mailto:peter.comba@aci.uni-heidelberg.de)

Frank Keppler: [frank.keppler@geow.uni-heidelberg.de](mailto:frank.keppler@geow.uni-heidelberg.de)

# These authors contributed equally

## Table of contents

| Title                                                                                                                                                                                                                                     | Page No. |
|-------------------------------------------------------------------------------------------------------------------------------------------------------------------------------------------------------------------------------------------|----------|
| Fig. S1: Conversion rates of 2-methoxyphenol to CH <sub>3</sub> OH and CH <sub>2</sub> O with different setups of the added iron species, acid, and H <sub>2</sub> O <sub>2</sub>                                                         | 4        |
| Fig. S2: Conversion rates of phenol to CH <sub>3</sub> OH and CH <sub>2</sub> O with different iron species, triflic acid, and H <sub>2</sub> O <sub>2</sub>                                                                              | 5        |
| Fig. S3: Conversion rates of sinapyl alcohol to CH <sub>3</sub> OH and CH <sub>2</sub> O with [(L)Fe <sup>II</sup> Cl <sub>2</sub> ] or Fe <sub>2</sub> O <sub>3</sub> , triflic acid or ascorbic acid, and H <sub>2</sub> O <sub>2</sub> | 6        |
| Fig. S4: Mass track of CH <sub>3</sub> OH in standard experiments with d <sub>3</sub> -2-methoxyphenol                                                                                                                                    | 7        |
| Fig. S5: Measurements of CH <sub>3</sub> OH in standard experiments with <sup>18</sup> OCH <sub>3</sub> -2-methoxyphenol                                                                                                                  | 8        |
| Fig. S6: Measurements of CH <sub>3</sub> OH in standard experiments with H <sub>2</sub> <sup>18</sup> O <sub>2</sub> instead of H <sub>2</sub> O <sub>2</sub> in the headspace and in H <sub>2</sub> O.                                   | 9        |
| Fig. S7: Measurements of CH <sub>3</sub> OH in standard experiments with <sup>18</sup> O <sub>2</sub> instead of atmospheric O <sub>2</sub> in the headspace and in H <sub>2</sub> O.                                                     | 10       |
| Fig. S8: Mass track of CH <sub>2</sub> O in standard experiments with d <sub>3</sub> -2-methoxyphenol                                                                                                                                     | 11       |
| Fig. S9: Chromatogram of CH <sub>3</sub> Br in alkyl radical trapping experiments with CCl <sub>3</sub> Br as a scavenger                                                                                                                 | 12       |
| Fig. S10: Conversion rates of lignin to CH <sub>3</sub> OH and CH <sub>2</sub> O with Fe <sub>2</sub> O <sub>3</sub> , triflic acid and H <sub>2</sub> O <sub>2</sub>                                                                     | 13       |
| Table S1: Soil samples from this study and <sup>1</sup> . TOC and methoxy content in w%. pH value was directly measured in the experiment after 48 h of incubation. Total iron content measured in [w%].                                  | 14       |
| Detailed TOC–methoxy–C <sub>1</sub> correlations                                                                                                                                                                                          | 14       |
| Fig. S11: Correlations between soil TOC and methoxy content, as well as between TOC or methoxy content with CH <sub>3</sub> OH + CH <sub>2</sub> O production in sterile soils.                                                           | 15       |
| Zeisel method application and removal of the methoxy content of three soils                                                                                                                                                               | 15-16    |
| Fig. S12: Soil methoxy content and formation of CH <sub>3</sub> OH and CH <sub>2</sub> O from soils before and after chemical removal of methoxy groups.                                                                                  | 16       |
| Isotopic labeling experiments in HI-treated soils                                                                                                                                                                                         | 17       |
| Fig. S13: Chromatogram of labeled CH <sub>3</sub> OH in soil experiments with added <sup>2</sup> H and <sup>18</sup> O labelled 2-methoxyphenol                                                                                           | 18-19    |
| pH manipulation experiments with soil PO                                                                                                                                                                                                  | 19       |
| Fig. S14: Abiotic formation of CH <sub>3</sub> OH and CH <sub>2</sub> O in soil experiments at different pH-values                                                                                                                        | 20       |
| Fig. S15: CH <sub>2</sub> O measurements in wet-dry-cycles with soil samples CH and GL1                                                                                                                                                   | 21       |
| Fig. S16: CH <sub>3</sub> OH measurements in wet-dry-cycles with soil samples CH and GL1                                                                                                                                                  | 22       |

|                                                                                                                                                                                                                                                         |    |
|---------------------------------------------------------------------------------------------------------------------------------------------------------------------------------------------------------------------------------------------------------|----|
| Fig. S17: Degradation of CH <sub>3</sub> OH in fresh soils (GL1, CH, and GL2) due to microorganisms.                                                                                                                                                    | 23 |
| Fig. S18: Degradation of abiotic-produced CH <sub>3</sub> OH in GL1 due to added methylotrophic bacteria                                                                                                                                                | 24 |
| Fig. S19: Measurement of CH <sub>3</sub> OH and CH <sub>2</sub> O in soil GL2 as a function of temperature                                                                                                                                              | 25 |
| Fig. S20: Computed reaction profile of the HAA mechanism of sinapyl alcohol.                                                                                                                                                                            | 26 |
| Fig. S21: Computed reaction profile of the OAT mechanism of sinapyl alcohol.                                                                                                                                                                            | 26 |
| Fig. S22: Optimized geometries (a-c) and spin density plots (d-e) for [(L)(OH <sub>2</sub> )Fe <sup>IV</sup> =O] <sup>2+</sup> .                                                                                                                        | 27 |
| Fig. S23: Optimized geometries (a-c) and spin density plots (d-e) of HAA mechanism for <sup>5</sup> TS1 <sub>HS</sub> , <sup>5</sup> INT1 <sub>HS</sub> and <sup>5</sup> TS2 <sub>HS</sub> .                                                            | 27 |
| Fig. S24: Optimized geometries (a-c) and spin density plots (d-e) of HAA mechanism for <sup>3</sup> P <sub>IS</sub> , and <sup>5</sup> P <sub>HS</sub> .                                                                                                | 28 |
| Fig. S25: Optimized geometries and spin density plots of demethoxylation mechanism for <sup>3</sup> TS1 <sub>HS</sub> (a, c), <sup>3</sup> INT1 <sub>HS</sub> (b, d), <sup>3</sup> TS2 <sub>HS</sub> (e, g) and <sup>3</sup> TS2' <sub>HS</sub> (f, h). | 29 |
| Fig. S26: Computed potential energy surface of [(L)(OH <sub>2</sub> )Fe <sup>IV</sup> =O] <sup>2+</sup> forming proton coupled electron transfer reactant complex.                                                                                      | 30 |
| Fig. S27: Optimized geometries (a-b) and spin density plots (c-d) of OSET mechanism for <sup>3</sup> R-HOTf and <sup>5</sup> R-HOTf.                                                                                                                    | 31 |
| Fig. S28: Optimized geometries (a-d) and spin density plots (e-h) of OSET mechanism for <sup>3</sup> RC, <sup>5</sup> RC, <sup>3</sup> RC' and <sup>5</sup> RC'.                                                                                        | 31 |
| References                                                                                                                                                                                                                                              | 32 |

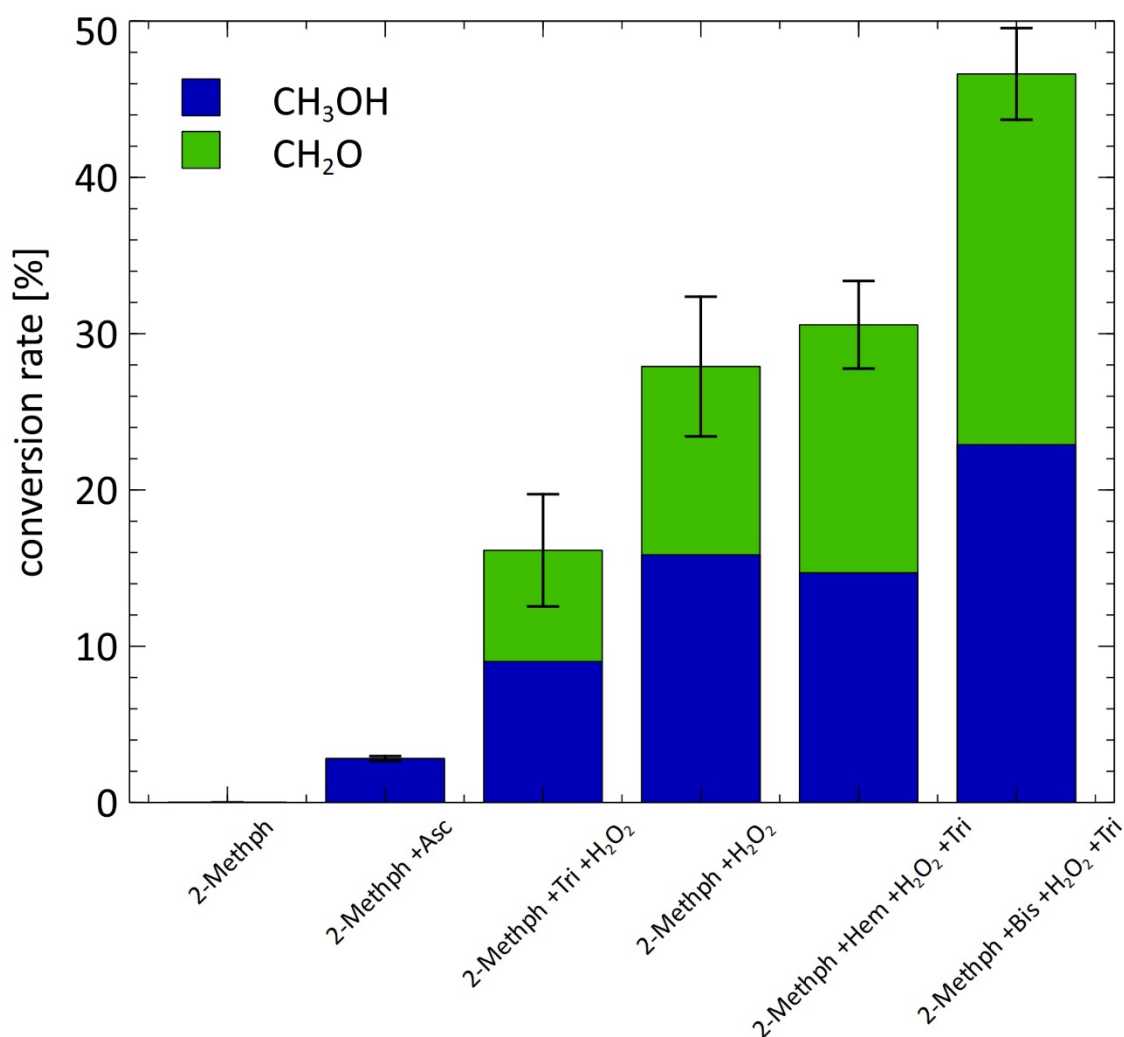

**Fig. S1: Conversion rates of 2-methoxyphenol to CH<sub>3</sub>OH and CH<sub>2</sub>O with different setups of the added iron species, acid, and H<sub>2</sub>O<sub>2</sub>**

Formation of CH<sub>3</sub>OH and CH<sub>2</sub>O from 2-methoxyphenol in experiments by removing parts of the reactants (10  $\mu$ mol [(L)Fe<sup>II</sup>Cl<sub>2</sub>], or Fe<sub>2</sub>O<sub>3</sub>, 200  $\mu$ mol H<sub>2</sub>O<sub>2</sub>, 100  $\mu$ mol ascorbic acid, and 0.05  $\mu$ mol triflic acid). Reactions were performed in 10 mL H<sub>2</sub>O. All provided data were evaluated at 22 °C and ambient pressure (1013 mbar) after 48 h reaction time. Conversion rates were related to one methoxy group. Error bars represent the standard deviation of total CH<sub>3</sub>OH and CH<sub>2</sub>O conversion, based on the mean of three independent experiments (n=3), each measured in triplicate.

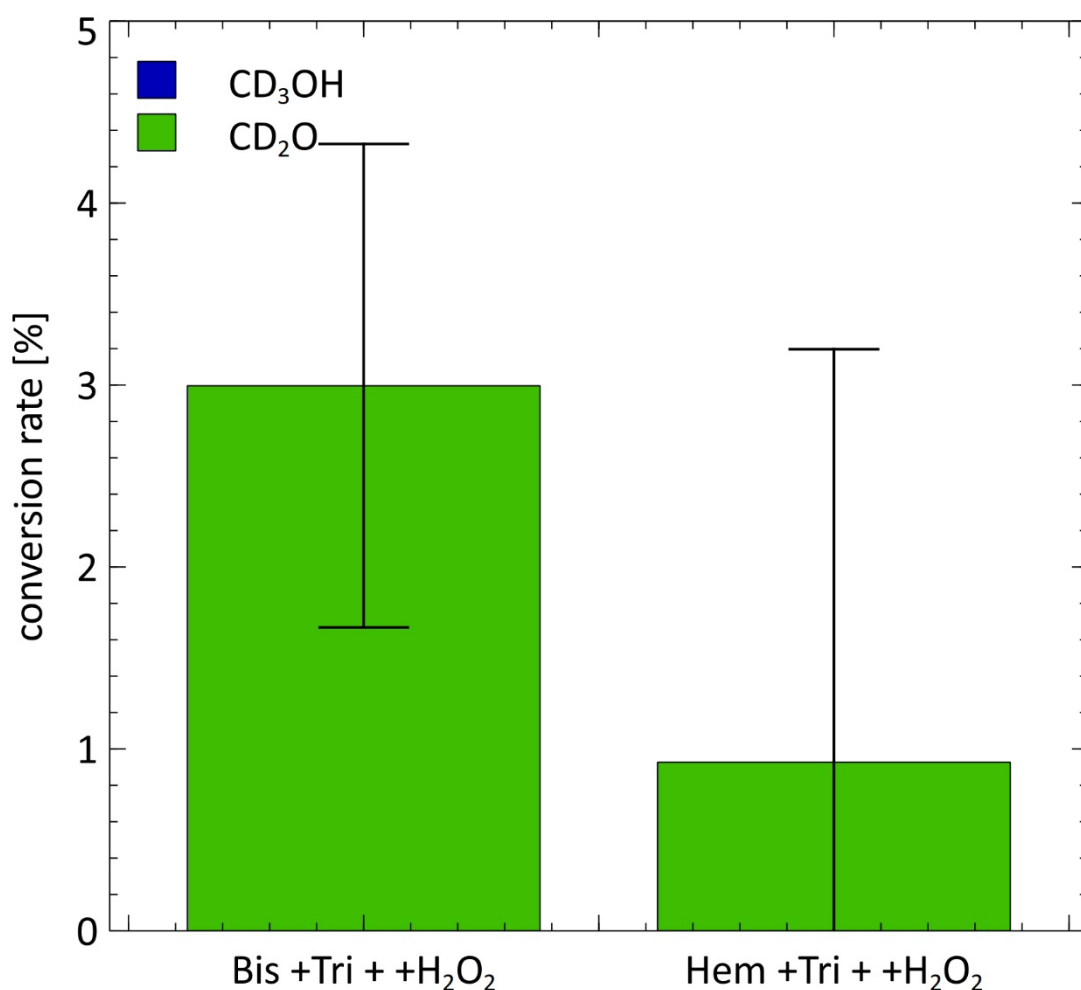

**Fig. S2: Conversion rates of phenol to CH<sub>3</sub>OH and CH<sub>2</sub>O with different iron species, triflic acid, and H<sub>2</sub>O<sub>2</sub>**

Formation of CH<sub>3</sub>OH and CH<sub>2</sub>O from phenol in experiments mediated 10 μmol [(L)Fe<sup>II</sup>Cl<sub>2</sub>], or Fe<sub>2</sub>O<sub>3</sub> with 200 μmol H<sub>2</sub>O<sub>2</sub>, and 0.05 μmol triflic acid. Reactions were performed in 10 mL H<sub>2</sub>O. All provided data were evaluated at 22 °C and ambient pressure (1013 mbar) after 48 h reaction time. Conversion rates were related to one methoxy group. Error bars represent the standard deviation of total CH<sub>3</sub>OH and CH<sub>2</sub>O conversion, based on the mean of three independent experiments (n=3), each measured in triplicate.

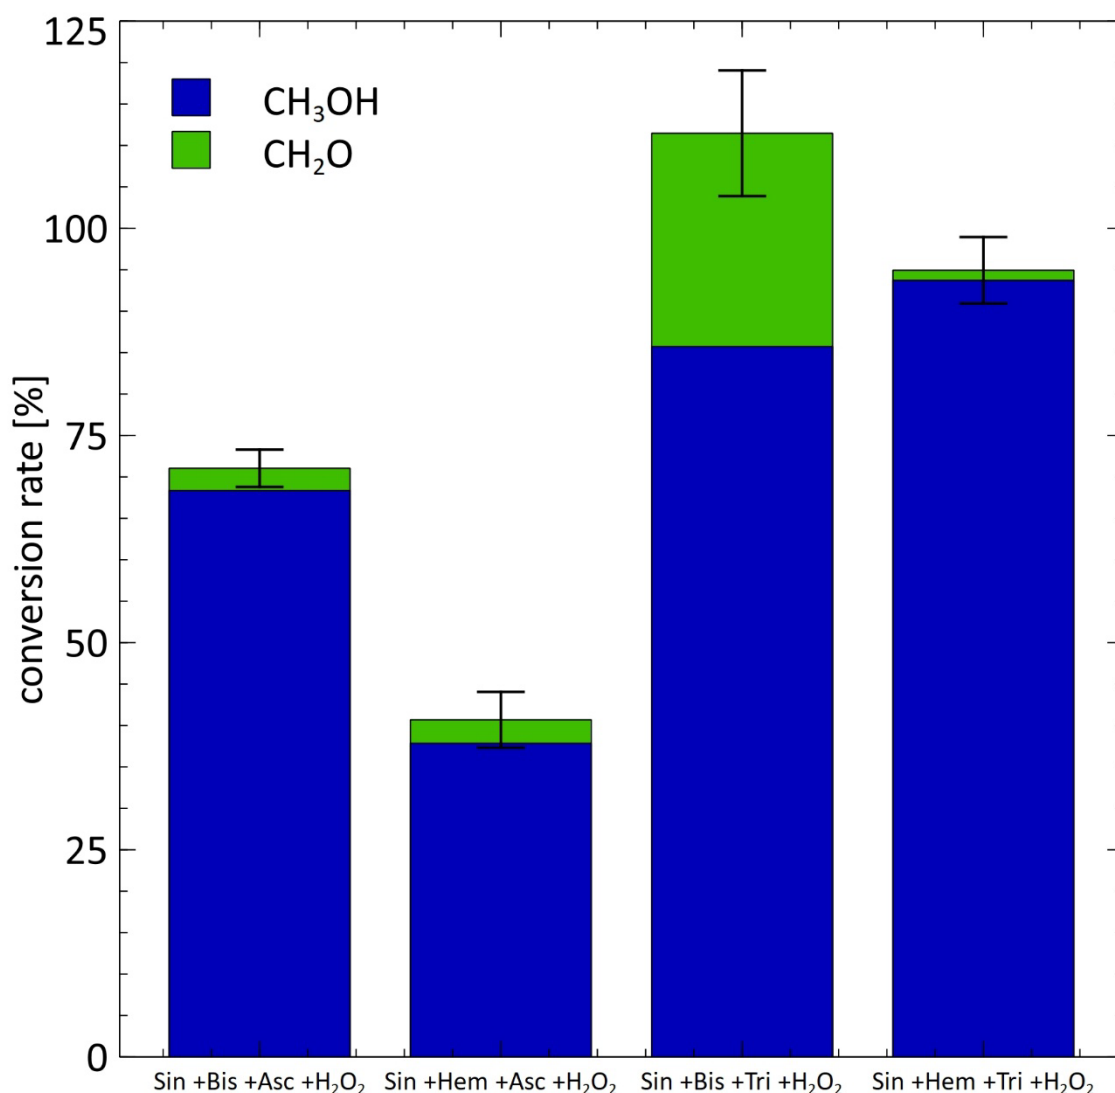

**Fig. S3: Conversion rates of sinapyl alcohol to CH<sub>3</sub>OH and CH<sub>2</sub>O with [(L)Fe<sup>II</sup>Cl<sub>2</sub>] or Fe<sub>2</sub>O<sub>3</sub>, triflic acid or ascorbic acid, and H<sub>2</sub>O<sub>2</sub>**

Formation of CH<sub>3</sub>OH and CH<sub>2</sub>O from sinapyl alcohol in experiments mediated 10  $\mu$ mol [(L)Fe<sup>II</sup>Cl<sub>2</sub>], or Fe<sub>2</sub>O<sub>3</sub> with 200  $\mu$ mol H<sub>2</sub>O<sub>2</sub>, and 0.05  $\mu$ mol triflic acid or 100  $\mu$ mol ascorbic acid. Reactions were performed in 10 mL H<sub>2</sub>O. All provided data were evaluated at 22 °C and ambient pressure (1013 mbar) after 48 h reaction time. Conversion rates were related to one methoxy group. Error bars represent the standard deviation (SD) of total CH<sub>3</sub>OH and CH<sub>2</sub>O conversion, based on the mean of three independent experiments (n=3), each measured in triplicate.

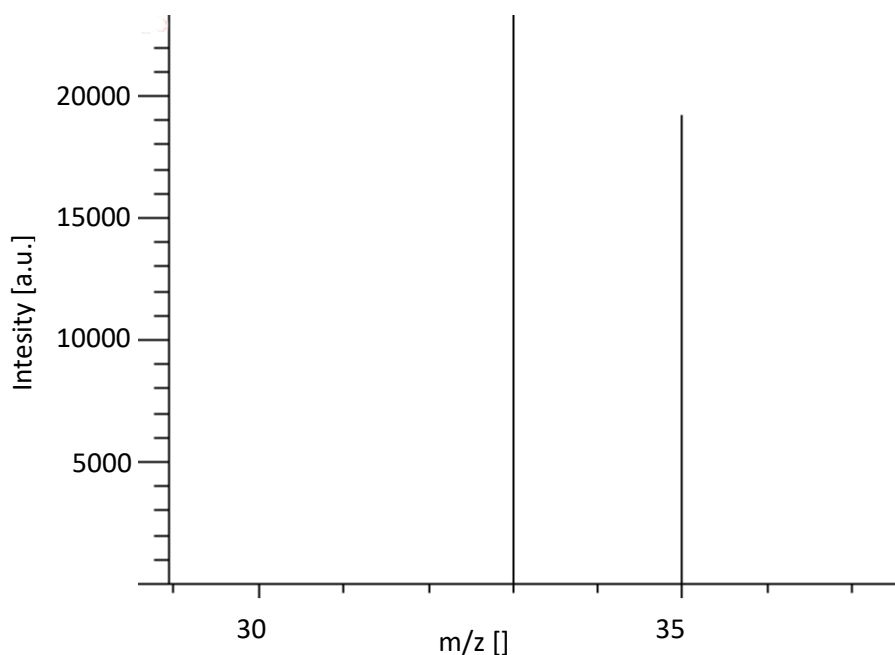

**Fig. S4: Mass track of CH<sub>3</sub>OH in standard experiments with d<sub>3</sub>-2-methoxyphenol**

The mass tracking of labeled CH<sub>3</sub>OH from experiments involving d<sub>3</sub>-2-methoxyphenol was measured in the headspace. This comprised using 25 µmol of d<sub>3</sub>-2-methoxyphenol, along with 200 µmol of H<sub>2</sub>O<sub>2</sub>, 10 µmol of [(L)Fe<sup>II</sup>Cl<sub>2</sub>], and 0.05 µmol of triflic acid (at pH=2.3), all dissolved in 10 mL of H<sub>2</sub>O. Characteristic masses of 33 and 35 were observed for the labeled CH<sub>3</sub>OH. The detection of mass 35 indicates that all three deuterium (<sup>2</sup>H) atoms from the d<sub>3</sub>-2-methoxyphenol are present in the labeled CH<sub>3</sub>OH.

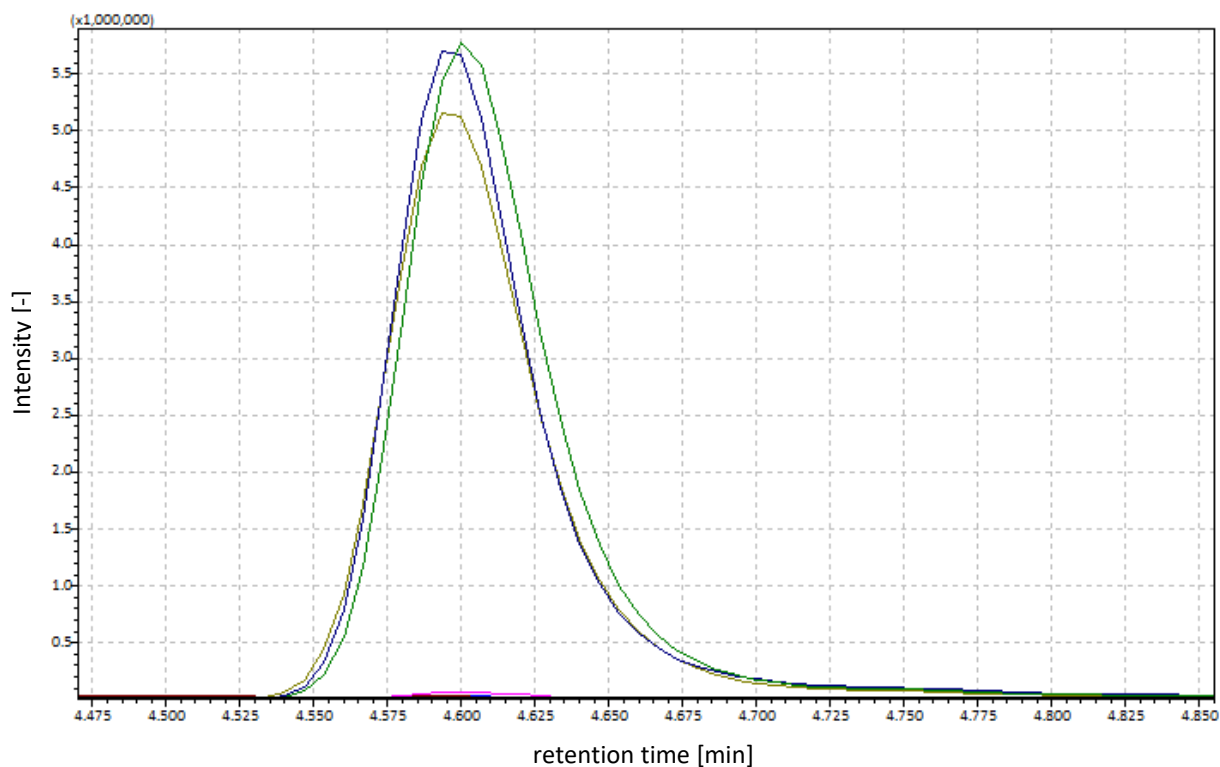

**Fig. S5: Measurements of CH<sub>3</sub>OH in standard experiments with <sup>18</sup>OCH<sub>3</sub>-2-methoxyphenol**

Experiment with 2 μmol <sup>18</sup>OCH<sub>3</sub> 2-methoxyphenol, 20 μmol H<sub>2</sub>O<sub>2</sub>, 1 μmol [(L)Fe<sup>II</sup>Cl<sub>2</sub>], and 0.005 μmol triflic acid (pH=2.3) dissolved in 1 mL H<sub>2</sub>O. Pink, blue, and brown chromatograms are the measured mass of 29, 30, and 31 of the produced CH<sub>3</sub>OH (small to no peaks) in experiments with <sup>18</sup>OCH<sub>3</sub> 2-methoxyphenol. The black line is the blank without substrate (no peak), and green, dark blue, and olive are the masses 33 and 34 of CH<sub>3</sub>OH (large peaks) measured in the same experiments.



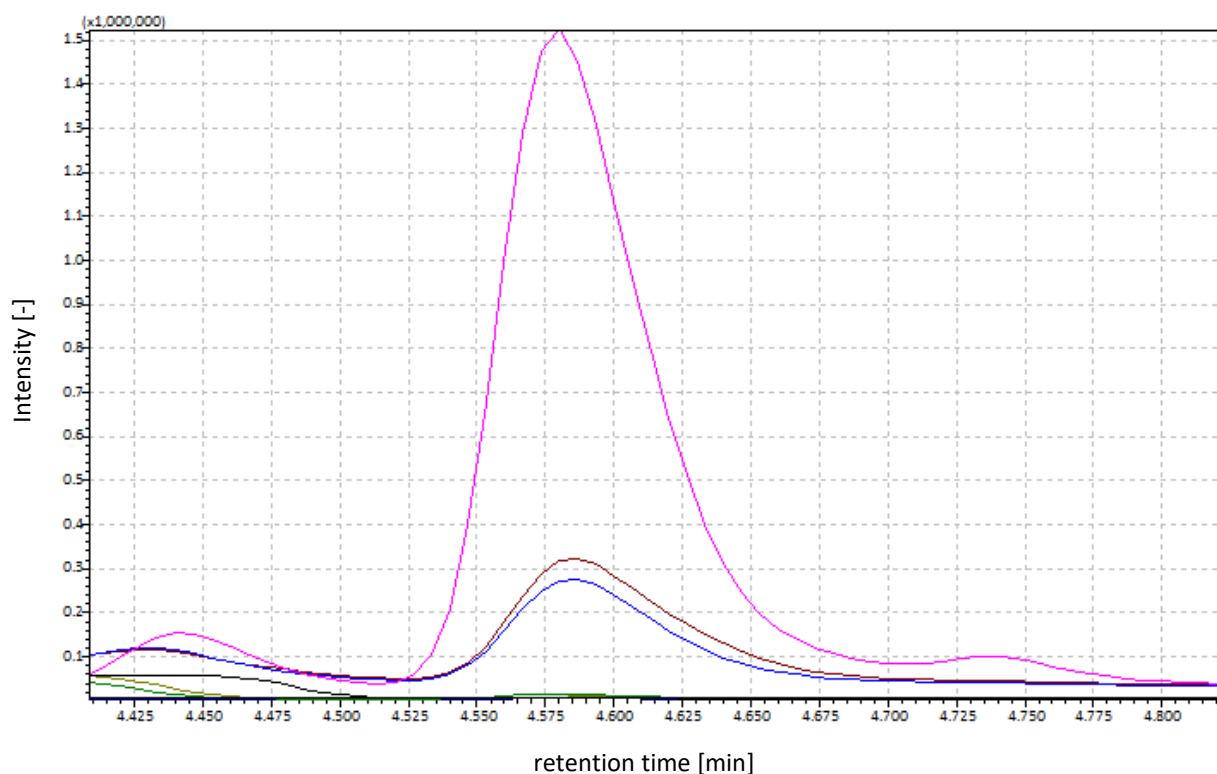

**Fig. S6: Measurements of CH<sub>3</sub>OH in standard experiments with H<sub>2</sub><sup>18</sup>O<sub>2</sub> instead of H<sub>2</sub>O<sub>2</sub> in the headspace and in H<sub>2</sub>O.**

Experiment with 25 μmol substrate (sinapyl alcohol, coniferyl alcohol, or 2-methoxyphenol), 200 μmol H<sub>2</sub><sup>18</sup>O<sub>2</sub>, 10 μmol [(L)Fe<sup>II</sup>Cl<sub>2</sub>], and 0.05 μmol triflic acid (pH=2.3) dissolved in 10 mL H<sub>2</sub>O. Pink, blue, and brown chromatograms are the measured mass of 29,30, and 31 of the produced CH<sub>3</sub>OH (large peaks) in experiments with sinapyl alcohol, coniferyl alcohol, and guaiacol. The black line is the blank without substrate (no peak), and green, dark blue, and olive are the masses 33 and 34 of CH<sub>3</sub>OH measured in the same experiments (small to no peaks).

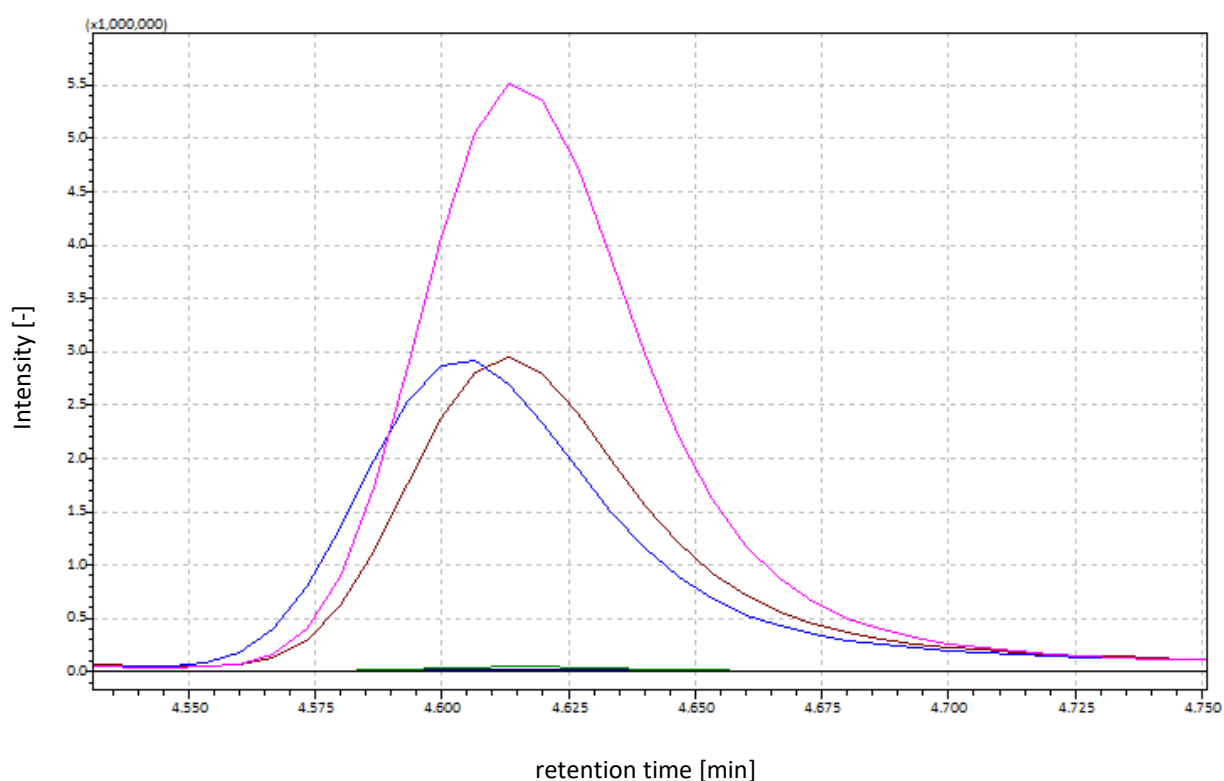

**Fig. S7: Measurements of CH<sub>3</sub>OH in standard experiments with <sup>18</sup>O<sub>2</sub> instead of atmospheric O<sub>2</sub> in the headspace and in H<sub>2</sub>O.**

Experiment with 25 μmol substrate (sinapyl alcohol, coniferyl alcohol, or 2-methoxyphenol), 200 μmol H<sub>2</sub>O<sub>2</sub>, 10 μmol [(L)Fe<sup>II</sup>Cl<sub>2</sub>], and 0.05 μmol triflic acid (pH=2.3) dissolved in 10 mL H<sub>2</sub>O. Pink, blue, and brown chromatograms are the measured mass of 29,30, and 31 of the produced CH<sub>3</sub>OH (large peaks) in experiments with sinapyl alcohol, coniferyl alcohol, and guaiacol. The black line is the blank without substrate (no peak), and green, dark blue, and olive are the masses 33 and 34 of CH<sub>3</sub>OH (small to no peaks) measured in the same experiments.

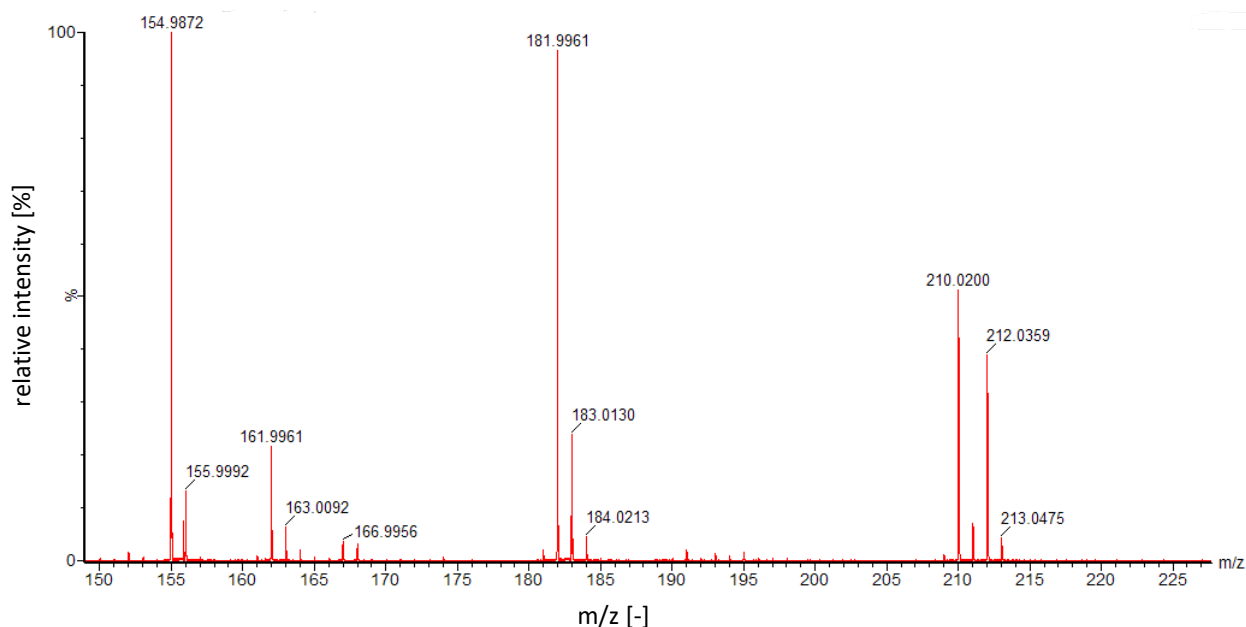

**Fig. S8: Mass track of CH<sub>2</sub>O in standard experiments with d<sub>3</sub>-2-methoxyphenol**

The mass tracking of labeled CH<sub>2</sub>O from experiments with d<sub>3</sub>-2-methoxyphenol was conducted using a standard protocol. This involved utilizing 25 μmol of d<sub>3</sub>-2-methoxyphenol, along with 200 μmol of H<sub>2</sub>O<sub>2</sub>, 10 μmol of [(L)Fe<sup>II</sup>Cl<sub>2</sub>], and 0.05 μmol of triflic acid (at pH=2.3), all dissolved in 10 mL of H<sub>2</sub>O. Characteristic masses of 155, 182, and 210 were observed for the derivatized CH<sub>2</sub>O. Additionally, the mass of 212 was identified for the CD<sub>2</sub>O, which originated from d<sub>3</sub>-2-methoxyphenol.

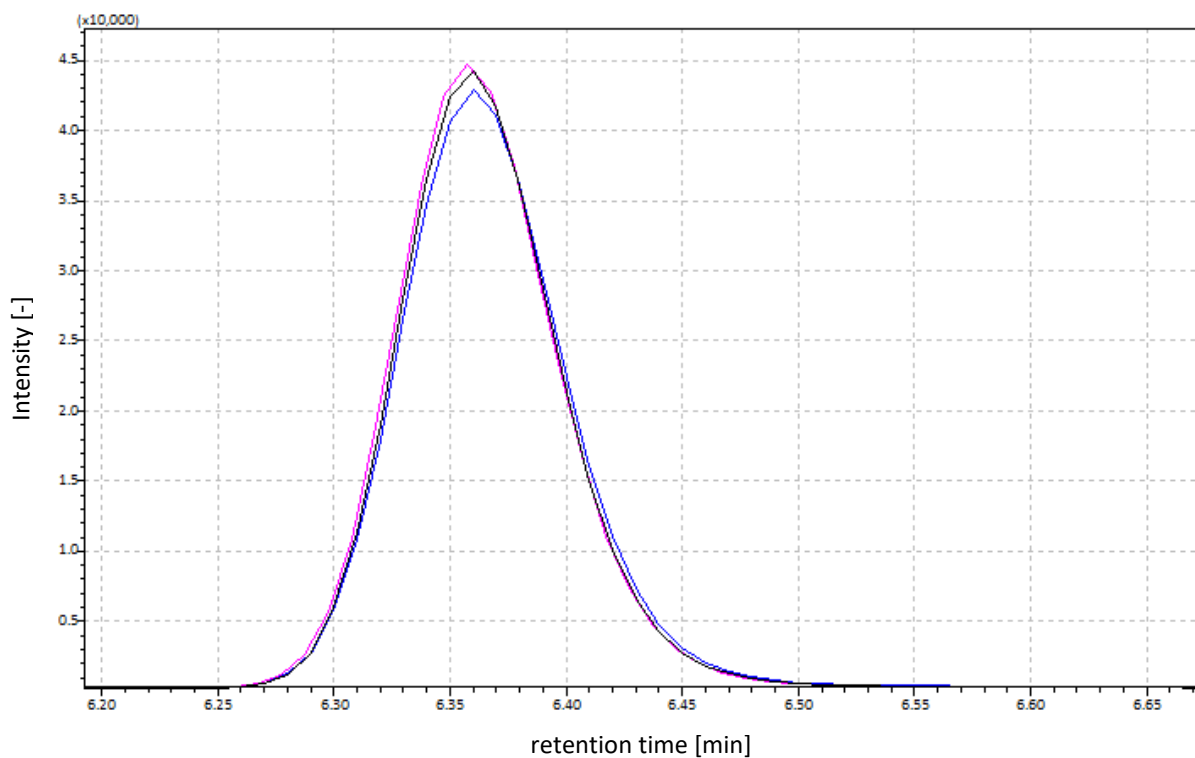

**Fig. S9: Chromatogram of  $\text{CH}_3\text{Br}$  in alkyl radical trapping experiments with  $\text{CCl}_3\text{Br}$  as a scavenger**

Measurement of mass 94 (stable isotope 79 of bromine) and mass 96 (stable isotope 81 of bromine) in experiments with sinapyl alcohol (pink) or 2-methoxyphenol (blue) ( $25\ \mu\text{mol}$  substrate,  $200\ \mu\text{mol}$  of  $\text{H}_2\text{O}_2$ ,  $10\ \mu\text{mol}$  of  $[(\text{L})\text{Fe}^{\text{II}}\text{Cl}_2]$ , and  $0.05\ \mu\text{mol}$  of triflic acid (at  $\text{pH}=2.3$ ), all dissolved in  $10\ \text{mL}$  of  $\text{H}_2\text{O}$ ). The black line is the blank without a substrate. No differences were measured between blank experiments and experiments with sinapyl alcohol and 2-methoxyphenol.

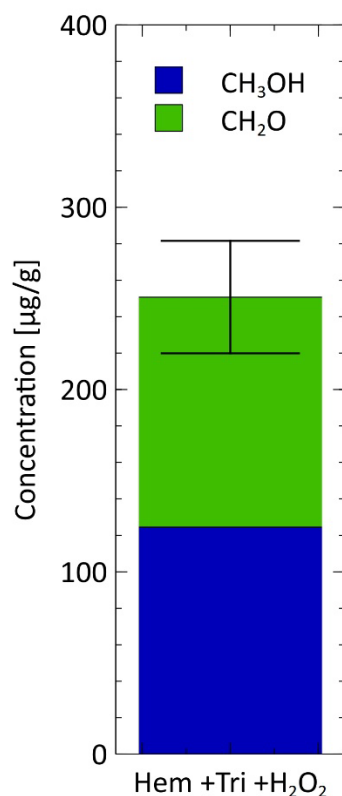

**Fig. S10: Conversion rates of lignin to CH<sub>3</sub>OH and CH<sub>2</sub>O with Fe<sub>2</sub>O<sub>3</sub>, triflic acid and H<sub>2</sub>O<sub>2</sub>**

Formation of CH<sub>3</sub>OH and CH<sub>2</sub>O from Lignin in experiments mediated 10 µmol Fe<sub>2</sub>O<sub>3</sub> with 200 µmol H<sub>2</sub>O<sub>2</sub>, and 0.05 µmol triflic acid. Reactions were performed in 10 mL H<sub>2</sub>O. All provided data were evaluated at 22 °C and ambient pressure (1013 mbar) after 48 h reaction time. Conversion rates were related to one methoxy group. Error bars represent the standard deviation of total CH<sub>3</sub>OH and CH<sub>2</sub>O conversion, based on the mean of three independent experiments (n=3), each measured in triplicate.

**Table S2: Soil samples from this study and reference<sup>1</sup>. TOC and methoxy content in w%. pH value was directly measured in the experiment after 48 h of incubation. Total iron content measured in [w%].**

| Soil sample                      | TOC [w%] | Methoxy content [w%] | pH   | Total iron content [%] |
|----------------------------------|----------|----------------------|------|------------------------|
| Birkenheide 10-25 cm             | 0.14     | 0.012                | 4.71 | 0,16                   |
| Birkenheide 25-35 cm             | -0.13    | 0.005                | 5.70 | 0,15                   |
| Malchenberg 5-15 cm              | 2.12     | 0.065                | 7.24 | 0,40                   |
| Walldorf 20-35 cm                | -0.58    | 0.009                | 5.22 | 0,37                   |
| Walldorf 5-15 cm                 | 1.23     | 0.036                | 4.21 | 0,36                   |
| Walldorf Oberboden               | 3.55     | 0.129                | 4.14 | 0,97                   |
| Schriesheim 1 0-5 cm             | 3.75     | 0.076                | 3.62 | 1,74                   |
| Schriesheim 2 Oberboden          | 1.06     | 0.033                | 7.47 | 1,85                   |
| Schriesheim 2 45-55 cm           | 0.93     | 0.023                | 7.63 | 0,27                   |
| Maxdorf Oberboden                | 4.35     | 0.123                | 3.87 | 0,26                   |
| Maxdorf 5-15 cm                  | 4.08     | 0.143                | 3.96 | 0,24                   |
| Maxdorf 15-30 cm                 | -0.61    | 0.011                | 5.30 | 1,58                   |
| Altlußheim ~20 cm                | 11.2     | 0.188                | 7.11 | 4,13                   |
| Hockenheim ~25 cm                | 6.19     | 0.197                | 7.60 | 3,37                   |
| Hockenheim 10-20 cm (GL1)        | 7.83     | 0.170                | 7.42 | 2,64                   |
| Walldorf SAP Wald 40-90 cm       | 0.07     | 0.004                | 5.20 | 0,56                   |
| Walldorf SAP Wald 10-40 cm       | 0.79     | 0.023                | 4.00 | 0,44                   |
| Walldorf SAP Wald 0-10 cm        | 16.2     | 0.423                | 3.50 | 0,40                   |
| Peterstal Berg Wald 10-40 cm     | 2.15     | 0.030                | 3.70 | 0,94                   |
| Peterstal Berg Wald 0-10 cm (PO) | 8.07     | 0.139                | 3.20 | 0,75                   |
| Unterhof Wald 20-100 cm          | 0.59     | 0.014                | 7.90 | 2,80                   |
| Unterhof Wald 0-10 cm (CH)       | 3.63     | 0.103                | 7.4  | 1,75                   |
| ST. Leon-Rot 10-40 cm            | 5.64     | 0.052                | 7.6  | 2,47                   |
| ST. Leon-Rot 0-10 cm             | 2.80     | 0,085                | 7.8  | 2,28                   |

#### *Detailed TOC–methoxy–C<sub>1</sub> correlations*

In these soils and additionally the previously studied soils, the methoxy group content and the TOC were measured (Fig. S11a)<sup>1</sup>. A high correlation between TOC and methoxy content ( $R^2 = 0.88$ ) was observed, indicating that a significant proportion of TOC is lignin-derived due to its high methoxy content. Additionally, the high correlation of the TOC with the produced CH<sub>3</sub>OH and CH<sub>2</sub>O (Fig. S11b) indicates that the TOC measurement gives a good prediction for the CH<sub>3</sub>OH and CH<sub>2</sub>O production of the soil and also that the production decreases with depth due to the normally decreasing TOC (Fig. S11b). Also, a correlation ( $R^2$ ) of 0.60 is displayed in Fig. S11c of the methoxy content with the produced CH<sub>3</sub>OH and CH<sub>2</sub>O

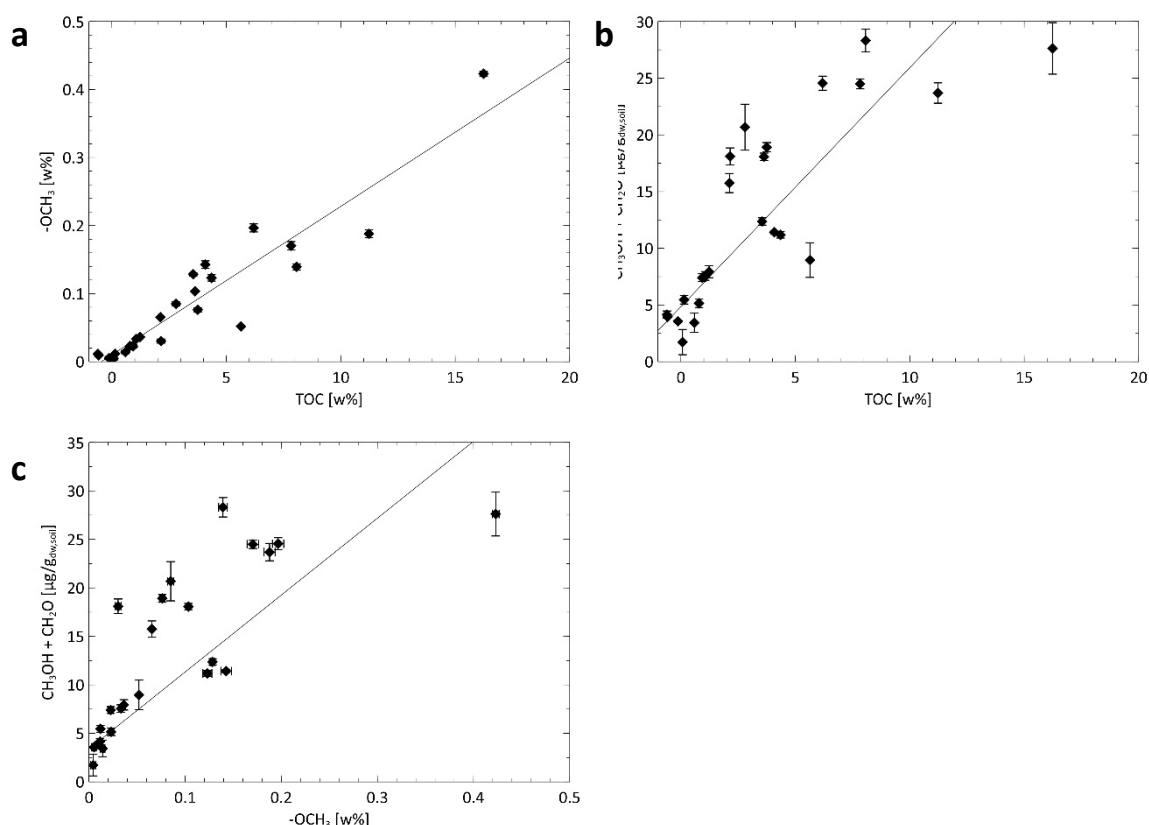

**Fig. S11: Correlations between soil TOC and methoxy content, as well as between TOC or methoxy content with  $\text{CH}_3\text{OH} + \text{CH}_2\text{O}$  production in sterile soils.**

**a)** Correlation of the TOC ( $n = 1$ ) with  $\text{OCH}_3$  content ( $n = 3$ ) of the investigated soil samples and additionally those previously investigated<sup>1</sup> with an  $R^2 = 0.88$ . **b)** Correlation of the TOC with the sum of  $\text{CH}_3\text{OH}$  and  $\text{CH}_2\text{O}$  concentrations ( $R^2 = 0.67$ ) in the identical soil samples. **c)** Correlation of the  $\text{OCH}_3$  content with the sum of  $\text{CH}_3\text{OH}$  and  $\text{CH}_2\text{O}$  concentrations ( $R^2 = 0.60$ ) in the identical soil samples. The experiments involved a two-day incubation period, during which 5 g of sterile soil was incubated in 10 ml ultra-pure  $\text{H}_2\text{O}$ .

#### *Zeisel method application and removal of the methoxy content of three soils*

Additional insight into the role of methoxy groups in abiotic C1 compound formation were gained through soil experiments involving chemical demethoxylation using the Zeisel method<sup>2</sup>, which employs hydroiodic acid to cleave methoxy groups from lignin. Following this treatment (Fig. S12a), the methoxy content in three selected soils (GL1, PO, and GL2) was reduced by 81.1% to 93.6%. As a result,  $\text{CH}_3\text{OH}$  production was completely abolished in all treated samples (Fig. S12b), while  $\text{CH}_2\text{O}$  concentrations were reduced by up to 83.5%. The residual

$\text{CH}_2\text{O}$  detected may stem from incomplete removal of methoxy groups. However, alternative explanations cannot be excluded: (i) the absence of  $\text{CH}_3\text{OH}$  may result from its rapid oxidation to  $\text{CH}_2\text{O}$  due to sufficient oxidative capacity in the soil system, and (ii) a portion of the  $\text{CH}_2\text{O}$  may originate from non-methoxy carbon precursors, as suggested by earlier model compound experiments involving aromatic substrates lacking methoxy groups<sup>1</sup>. Nonetheless, the complete suppression of  $\text{CH}_3\text{OH}$  formation and the substantial reduction in  $\text{CH}_2\text{O}$  levels in demethoxylated soils provide strong evidence that both compounds primarily derive from native methoxy groups in soil organic matter.

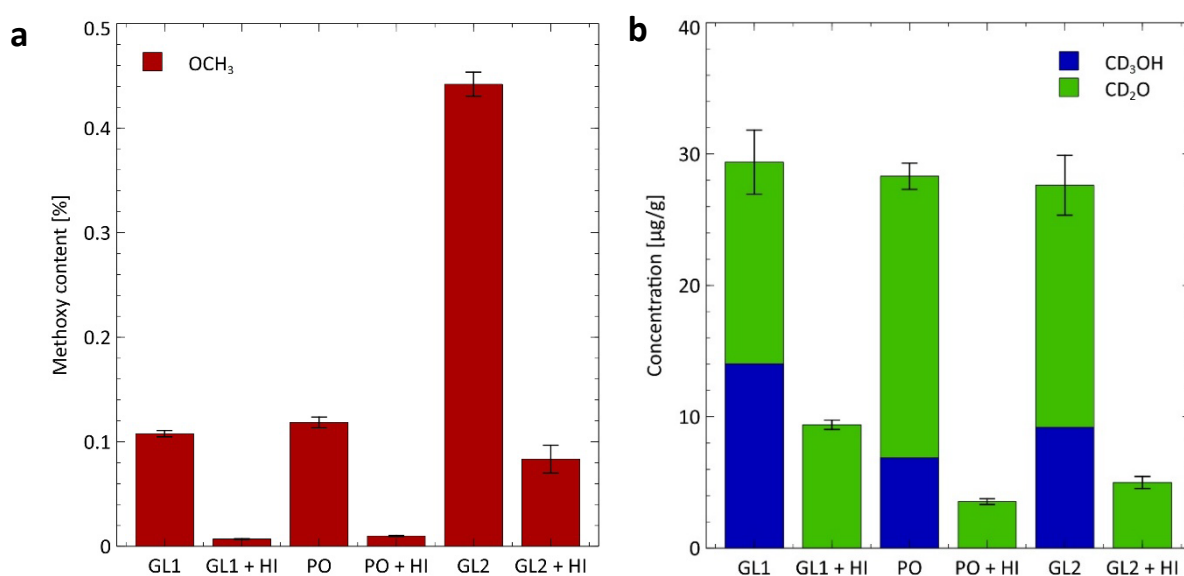

**Fig. S12: Soil methoxy content and formation of  $\text{CH}_3\text{OH}$  and  $\text{CH}_2\text{O}$  from soils before and after chemical removal of methoxy groups.** **a)** Methoxy group content in soils (30 g) GL1 (0–20 cm), PO (0–10 cm), and GL2 (0–10 cm) before and after treatment with hydroiodic acid (HI, 25 ml; 57 % at 105 °C for 2 h). **b)** Formation of  $\text{CH}_3\text{OH}$  and  $\text{CH}_2\text{O}$  in the same soils (5g in 10 ml ultrapure water at 22 °C and 1013 mbar) before and after chemical removal of methoxy groups. Error bars represent the standard deviation from  $n = 3$  independent measurements for methoxy content (**a**) and of the total  $\text{CH}_3\text{OH}$  and  $\text{CH}_2\text{O}$  conversion, based on the mean of three independent experiments ( $n = 3$ ), each measured in triplicate (**b**).



*Isotopic labeling experiments in HI-treated soils*

To unequivocally confirm that hydroiodic acid-treated soil (GL+HI) retains the ability to convert externally supplied methoxy groups into  $\text{CH}_3\text{OH}$ , we conducted isotopic labeling experiments. Isotopically labelled 2-methoxyphenol—either with a fully deuterated methyl group ( $\text{d}_3$ ) or with an  $^{18}\text{O}$ -labelled methoxy oxygen—was added to aqueous suspensions of the HI-treated soil. The formation of  $\text{CH}_3\text{OH}$  containing either the  $^{18}\text{O}$  label or all three deuterium atoms was successfully detected (Fig. S13 a, b). These results clearly demonstrate that the demethoxylated soil system remains reactive and can transform 2-methoxyphenol into  $\text{CH}_3\text{OH}$  via the same mechanism observed in the model compound experiments. This supports the idea that native soil conditions—characterized by abundant lignin-derived methoxy groups, iron-bearing minerals, and continuous in situ production of reactive oxygen species (e.g.,  $\text{H}_2\text{O}_2$  and  $\bullet\text{OH}$ )<sup>3–6</sup>—can drive abiotic  $\text{CH}_3\text{OH}$  formation.

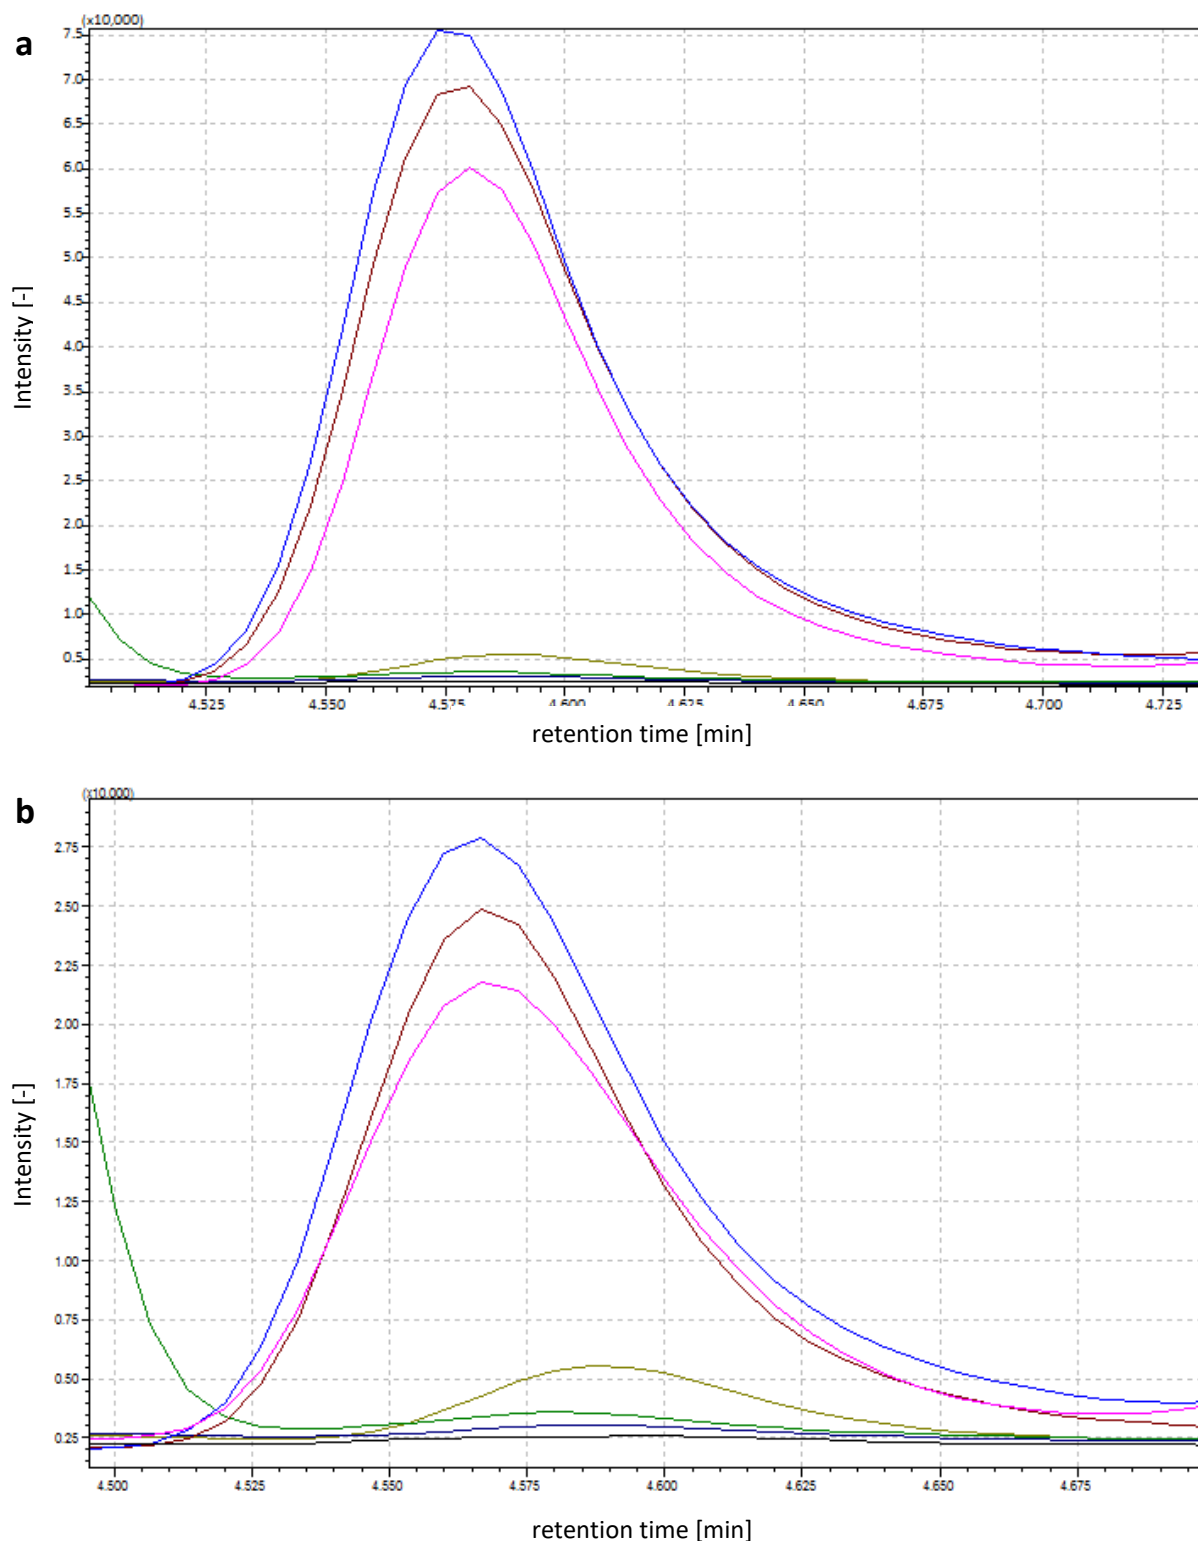

**Fig. S13: Chromatogram of labeled  $\text{CH}_3\text{OH}$  in soil experiments with added  $^2\text{H}$  and  $^{18}\text{O}$  labelled 2-methoxyphenol**

Chromatogram of mass 33,34 and 35 of  $\text{C}^2\text{H}_3\text{OH}$  (a) or mass 33 and 34 of  $\text{CH}_3^{18}\text{OH}$  (b) in experiments where the methoxy groups were removed from the soil samples GL1, PO and GL2 using the Zeisel method<sup>2</sup> with 1 g soil and 2 ml  $\text{H}_2\text{O}$  with added  $5\mu\text{mol}$  (a) d3-2-methoxyphenol and (b)  $5\mu\text{mol}$   $^{18}\text{O}$ -2-methoxyphenol. Blue, brown, and pink are the experiments with labelled

2-methoxyphenol (large peaks), light green, dark green, and purple are the non-spiked soils (small to no peaks), and black (no peak) is pure H<sub>2</sub>O. A production of labeled CH<sub>3</sub>OH is clearly visible compared to the unlabeled soils and pure H<sub>2</sub>O.

#### *pH manipulation experiments with soil PO*

The investigated soil samples spanned a pH range of 3.50 to 7.63, representing typically acidic soils widely distributed across terrestrial ecosystems. To assess the influence of pH on abiotic C<sub>1</sub> compound formation, we selected soil sample PO, which had an initial pH of 3.2, and incrementally adjusted it to more neutral values (pH 3.9, 5.2, 6.2, and 6.9). As shown in Fig. S14, CH<sub>3</sub>OH concentrations increased consistently with rising pH. In contrast, CH<sub>2</sub>O concentrations generally declined with increasing pH, except for a slight increase observed at pH 6.9. The total yield of CH<sub>3</sub>OH and CH<sub>2</sub>O remained relatively constant across treatments, within the margin of experimental error, apart from a modest elevation at pH 6.9. These patterns may be explained by the pH-dependent redox behavior of iron: at higher pH, Fe<sup>3+</sup> is increasingly reduced to Fe<sup>2+</sup>,<sup>7</sup> which then requires additional oxidative capacity (e.g., H<sub>2</sub>O<sub>2</sub> or ROS) to regenerate reactive Fe<sup>4+</sup>=O species. Also, the Fe<sup>3+</sup> has, in general, a much lower solubility than Fe<sup>2+</sup>.<sup>7</sup> This shift may reduce the availability of oxidants required to convert CH<sub>3</sub>OH to CH<sub>2</sub>O, thereby promoting CH<sub>3</sub>OH accumulation at higher pH levels. Moreover, it is difficult to directly compare the soil experiments with model studies in homogeneous solution.

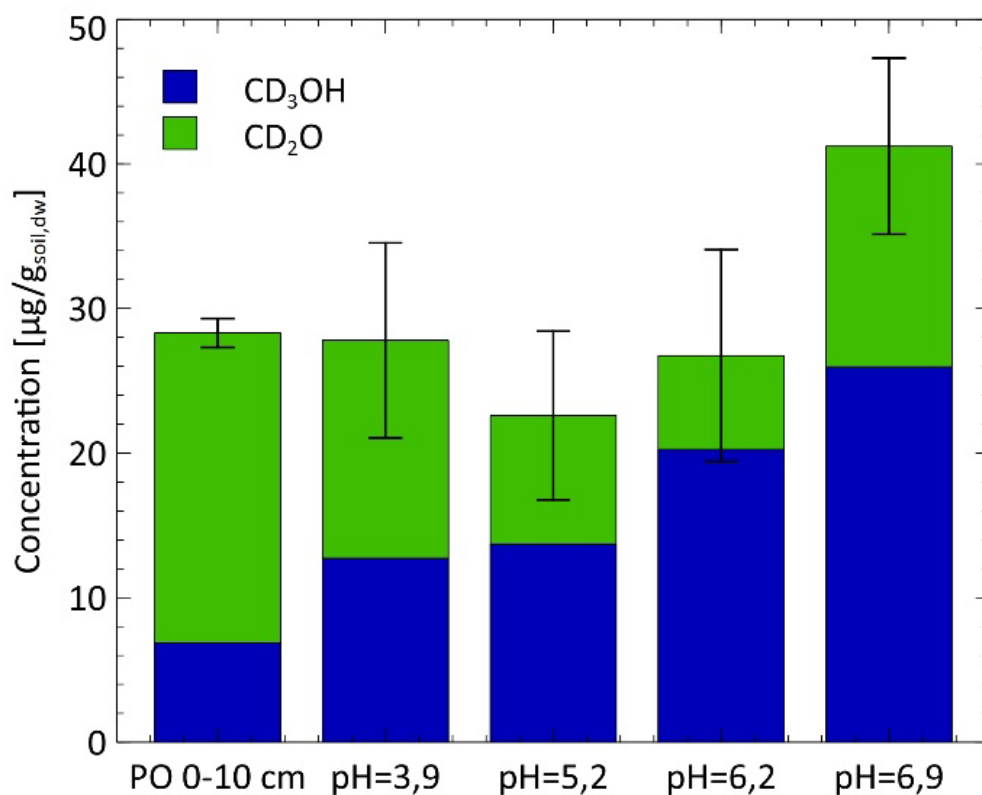

**Fig. S14: Abiotic formation of CH<sub>3</sub>OH and CH<sub>2</sub>O in soil experiments at different pH-values**

Formation of CH<sub>3</sub>OH and CH<sub>2</sub>O from soil sample PO 0-10 incubated under sterile aqueous conditions with pH adjustments with NaOH (3.2-6.9). Soils (5 g each) were suspended in ultrapure water (10 mL) and incubated for 48 hours at ambient temperature and pressure (22 °C, 1013 mbar). Error bars represent the standard deviation of total CH<sub>3</sub>OH and CH<sub>2</sub>O conversion, based on the mean of three independent experiments (n=3), each measured in triplicate.

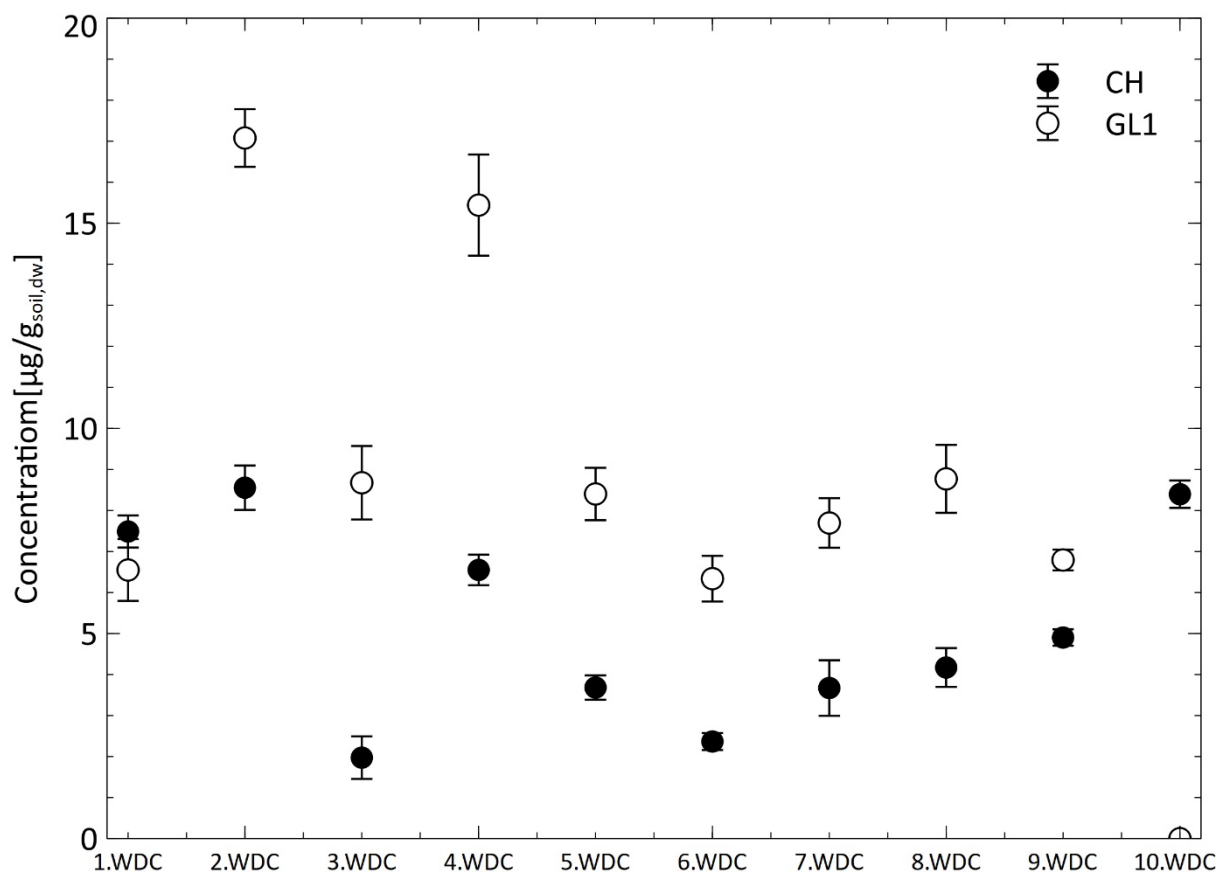

**Fig. S15: CH<sub>2</sub>O measurements in wet-dry-cycles with soil samples CH and GL1**

Concentrations of CH<sub>2</sub>O were measured across three wet-dry cycles of soil samples from CH and GL1. The reaction time was 48 h, followed by drying the soils at 105 °C for at least one day before rewetting them 10 times. The concentrations decreased from  $7.49 \pm 0.39 \mu\text{g/g}_{\text{soil, dw}}$  and  $6.55 \pm 0.75 \mu\text{g/g}_{\text{soil, dw}}$ , to  $4.90 \pm 0.20 \mu\text{g/g}_{\text{soil, dw}}$  and  $6.79 \pm 0.25 \mu\text{g/g}_{\text{soil, dw}}$ , respectively (at 10 WDC). CH<sub>2</sub>O data from CH and GL1 could not be measured. This results in a total sum of 46.0 and 90.0  $\mu\text{g/g}_{\text{soil,dw}}$  of CH<sub>2</sub>O. When converted to the total methoxy content in the soil, this represents a conversion of 4.44 and 4.79% of the methoxy groups to CH<sub>3</sub>OH. Error bars represent the standard deviation of total CH<sub>3</sub>OH and CH<sub>2</sub>O conversion, based on the mean of three independent experiments (n=3), each measured in triplicate.

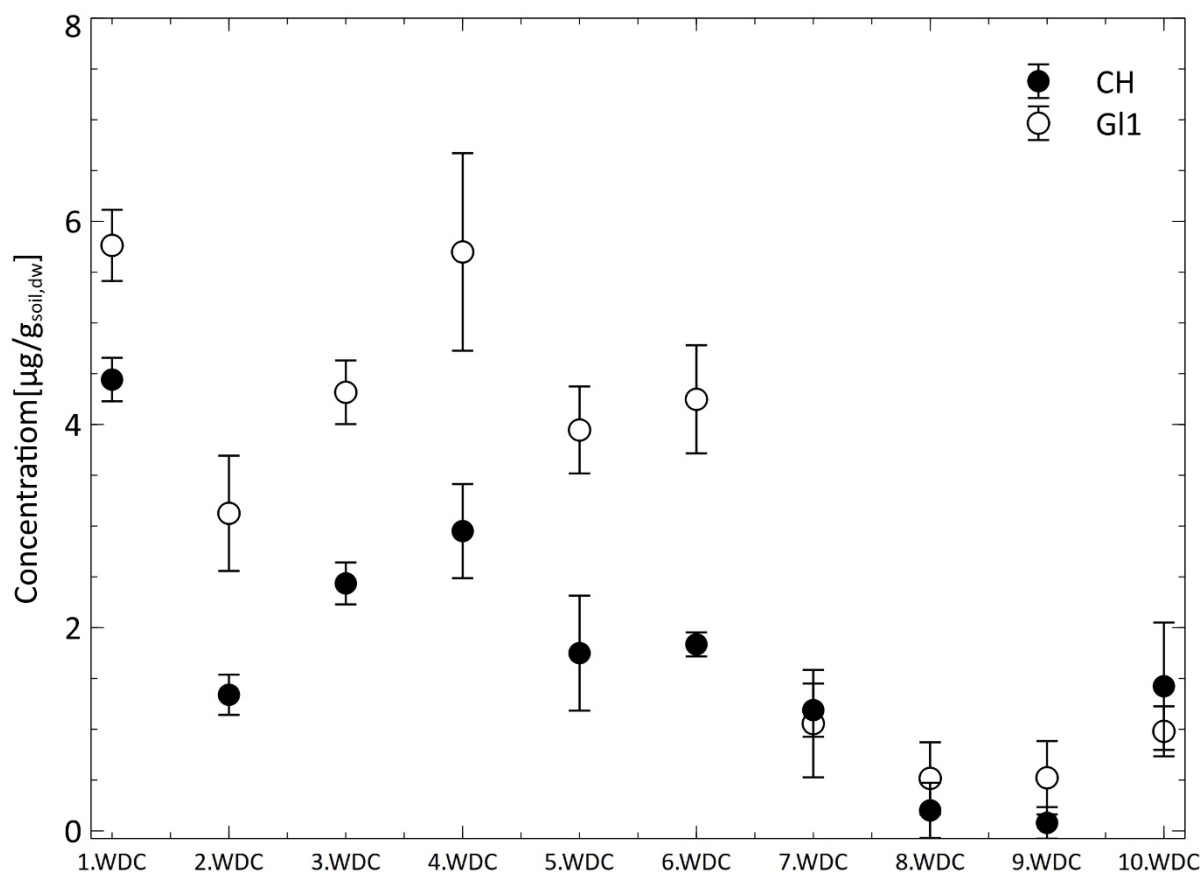

**Fig. S16: CH<sub>3</sub>OH measurements in wet-dry-cycles with soil samples CH and GL1**

Concentrations of CH<sub>3</sub>OH were measured across three wet-dry cycles of soil samples from CH and GL1. The reaction time was 48 h, followed by drying the soils at 105 °C for at least one day before rewetting and drying them 10 times. The starting concentrations are  $4.44 \pm 0.21 \mu\text{g/g}_{\text{soil,dw}}$  and  $5.76 \pm 0.35 \mu\text{g/g}_{\text{soil,dw}}$  and the final concentrations are  $1.42 \pm 0.63 \mu\text{g/g}_{\text{soil,dw}}$  and  $0.98 \pm 0.25 \mu\text{g/g}_{\text{soil,dw}}$ , respectively. This results in a total sum of 18.1 and 31.6  $\mu\text{g/g}_{\text{soil,dw}}$  of CH<sub>3</sub>OH. When converted to the total methoxy content in the soil, this represents a conversion of 1.74% and 1.68% of the methoxy groups to CH<sub>3</sub>OH. Error bars represent the standard deviation of total CH<sub>3</sub>OH and CH<sub>2</sub>O conversion, based on the mean of three independent experiments (n=3), each measured in triplicate.

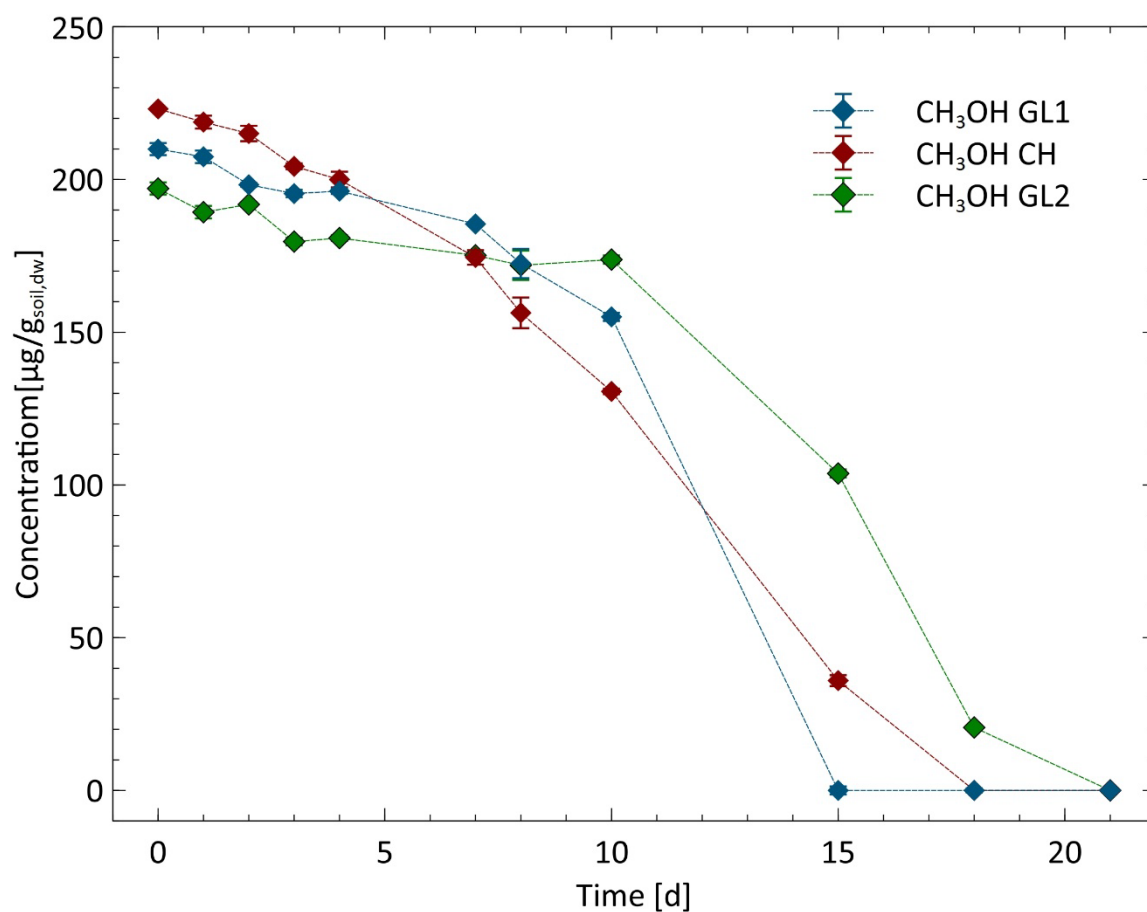

**Fig. S17: Degradation of CH<sub>3</sub>OH in fresh soils (GL1, CH, and GL2) due to microorganisms.**

Concentrations of CH<sub>3</sub>OH were measured over 21 days in one experiment for each soil (50 g) suspended in 100 mL ultra-pure H<sub>2</sub>O and stored at 22 °C under ambient pressure (1013 mbar). The error bars represent the SD of the total conversion of CH<sub>3</sub>OH in one experiment with triple measurements ( $n = 3$ ).

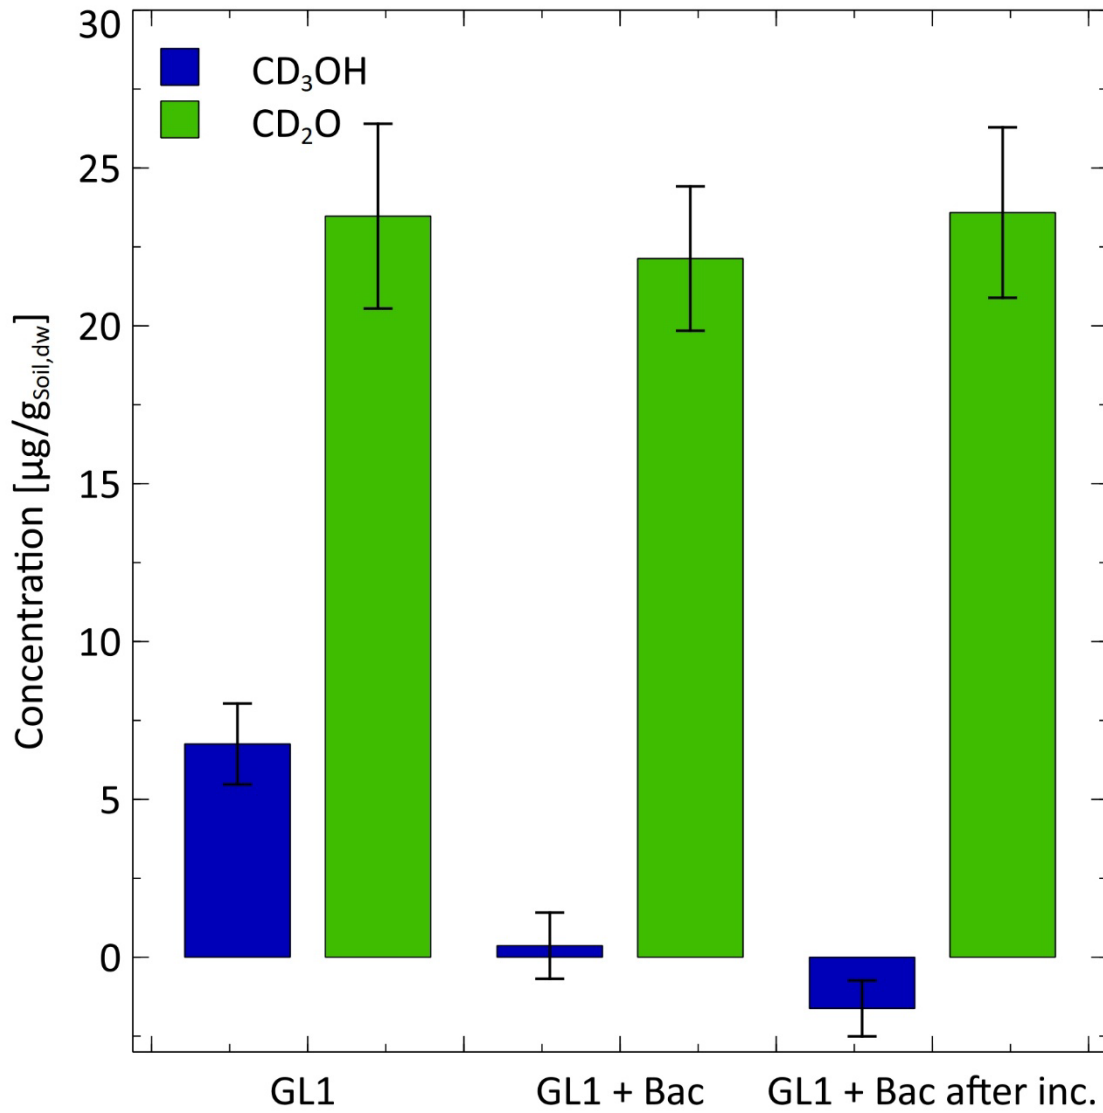

**Fig. S18: Degradation of abiotic-produced  $CH_3OH$  in GL1 due to added methylotrophic bacteria**

Addition of methylorubrum extorquens bacteria prior to and after the soil experiment GL1, with  $CH_3OH$  degradation in both experiments, and no changes in  $CH_2O$  concentration.  $CH_3OH$  and  $CH_2O$  measurements after 5 days in the experiment, when the bacteria were added after the abiotic experiment. Error bars represent the standard deviation (SD) of total  $CH_3OH$  and  $CH_2O$  conversion, based on the mean of three independent experiments ( $n=3$ ), each measured in triplicate.



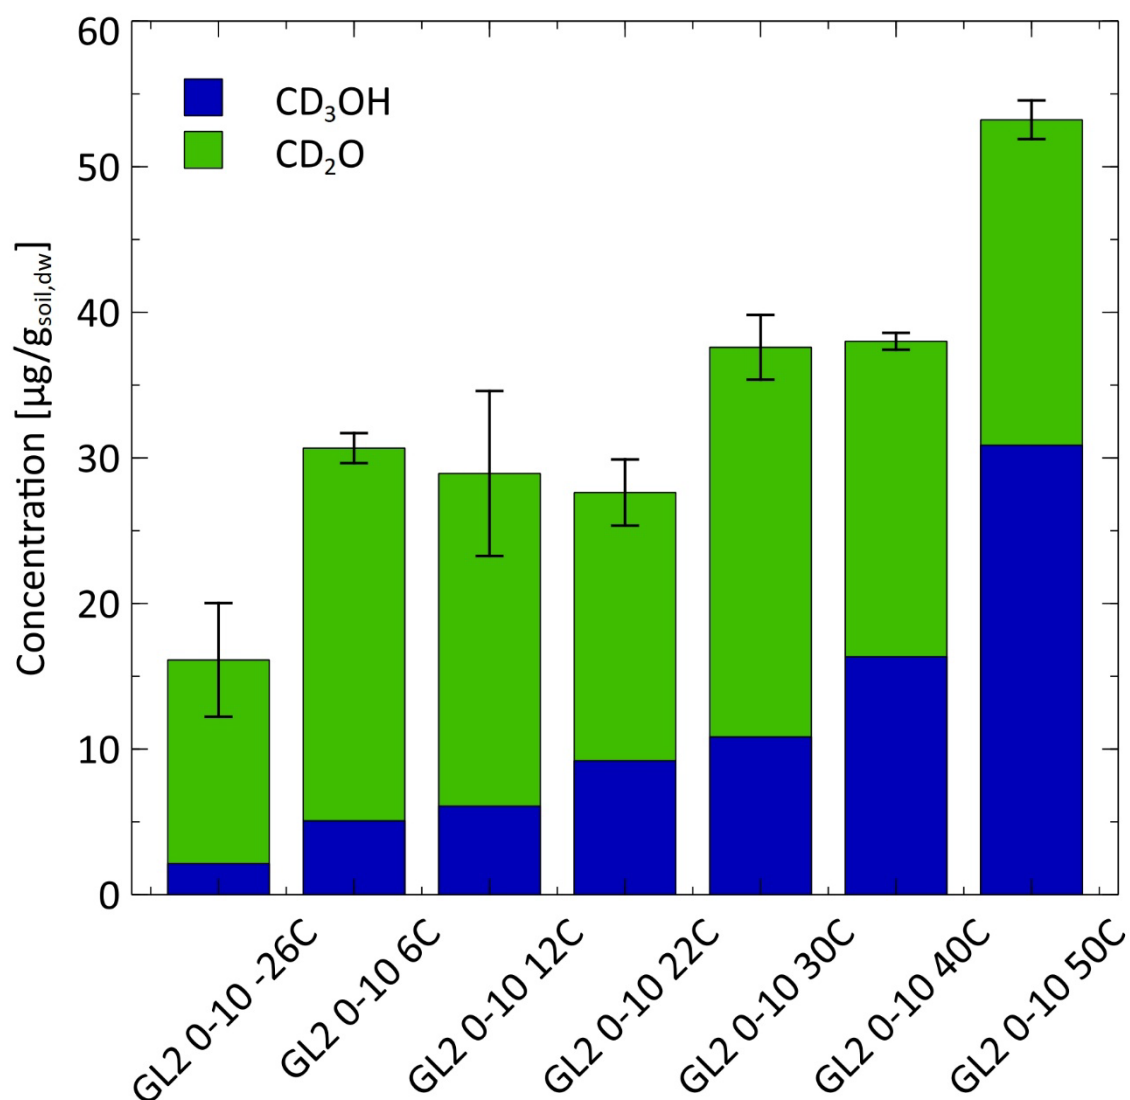

**Fig. S19: Measurement of CH<sub>3</sub>OH and CH<sub>2</sub>O in soil GL2 as a function of temperature**

Formation of CH<sub>3</sub>OH and CH<sub>2</sub>O from soil sample GL2 0-10 incubated under sterile aqueous conditions with different temperatures (-26 – 50 °C). Soils (5 g each) were suspended in ultrapure water (10 mL) and incubated for 48 hours under atmospheric pressure (1013 mbar). Error bars represent the standard deviation of total CH<sub>3</sub>OH and CH<sub>2</sub>O conversion, based on the mean of three independent experiments (n=3), each measured in triplicate.

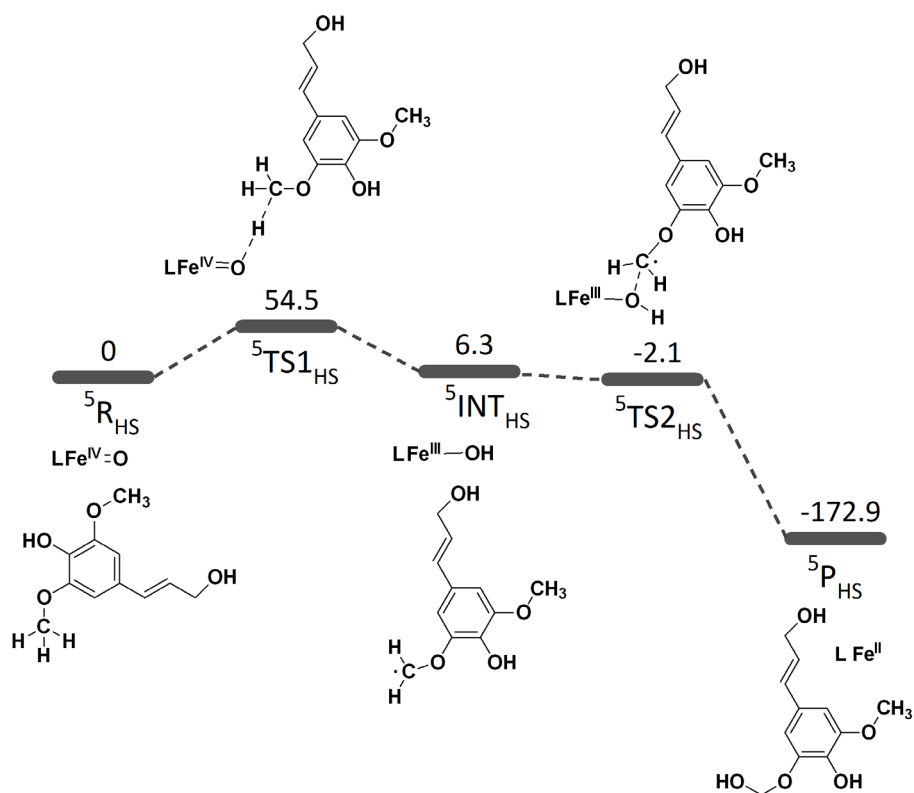

**Fig. S20:** Computed reaction profile of the HAA mechanism of sinapyl alcohol.

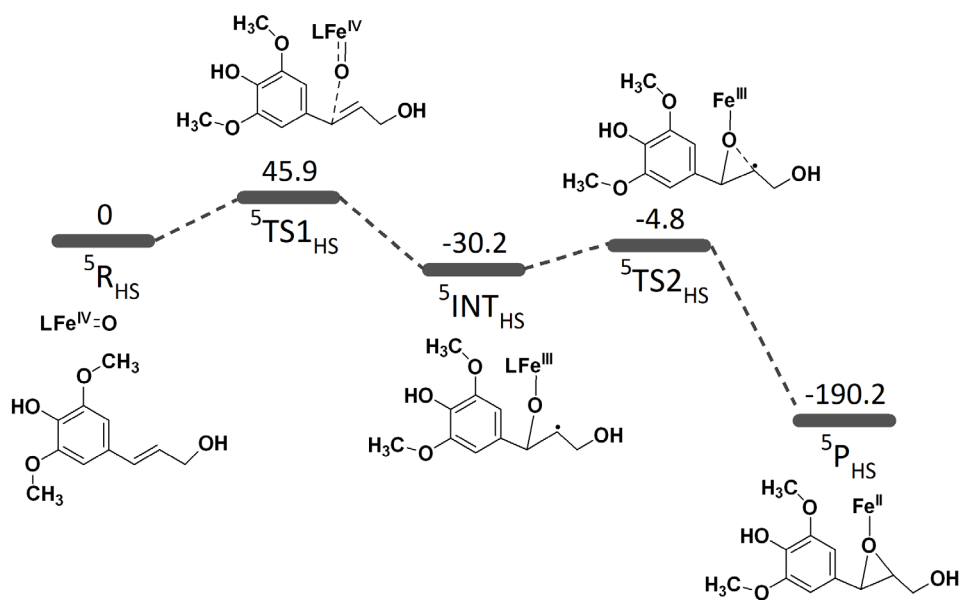

**Fig. S21:** Computed reaction profile of the OAT mechanism of sinapyl alcohol.

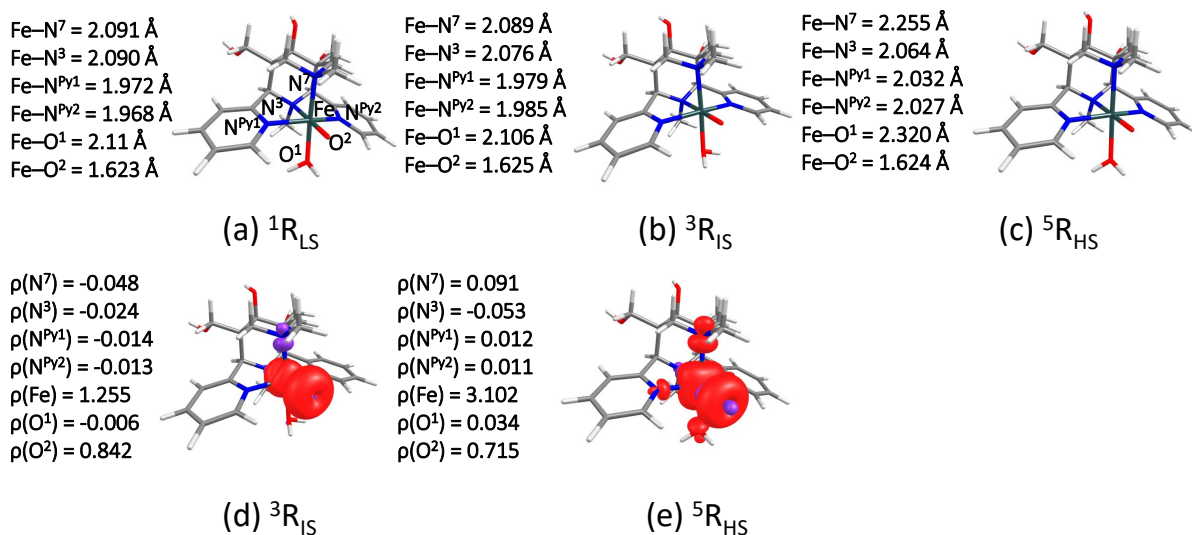

**Fig. S22:** Optimized geometries (a-c) and spin density plots (d-e) for  $[(\text{L})(\text{OH}_2)\text{Fe}^{\text{IV}}=\text{O}]^{2+}$ .

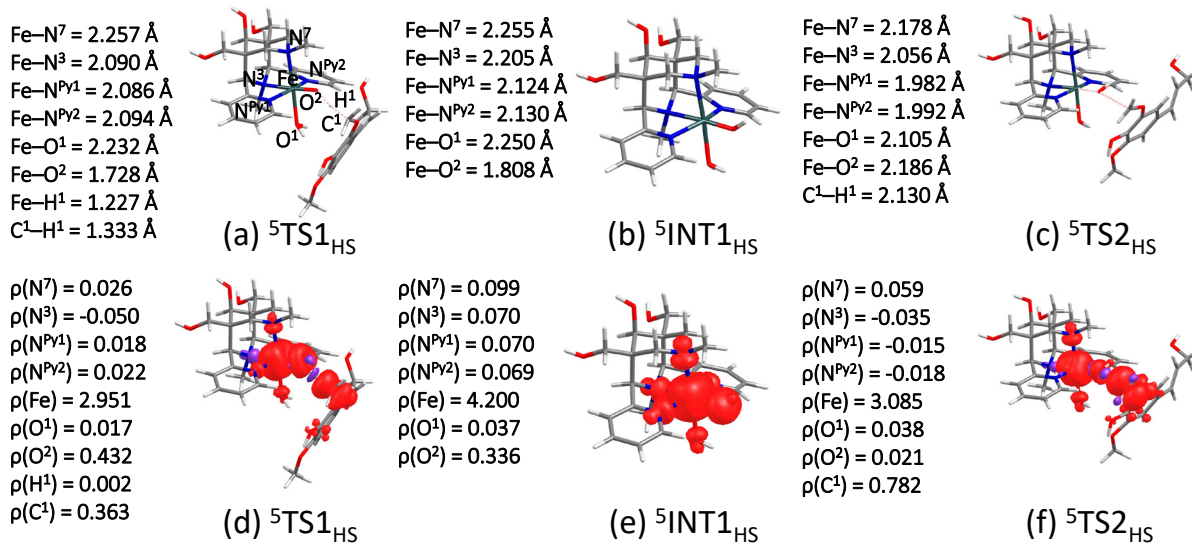

**Fig. S23:** Optimized geometries (a-c) and spin density plots (d-e) of HAA mechanism for <sup>5</sup>TS1<sub>HS</sub>, <sup>5</sup>INT1<sub>HS</sub> and <sup>5</sup>TS2<sub>HS</sub>.

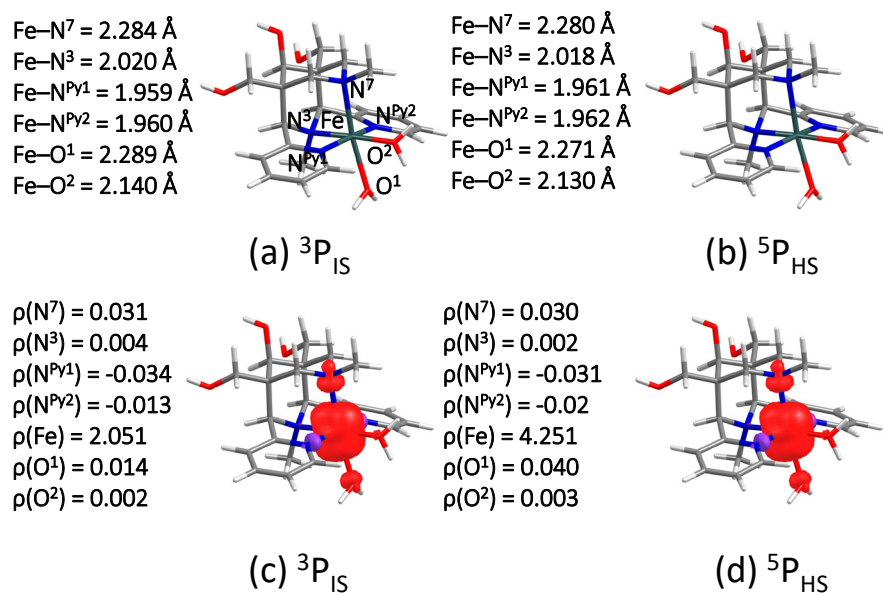

**Fig. S24:** Optimized geometries (a-c) and spin density plots (d-e) of HAA mechanism for  $^3\text{P}_{\text{IS}}$ , and  $^5\text{P}_{\text{HS}}$ .

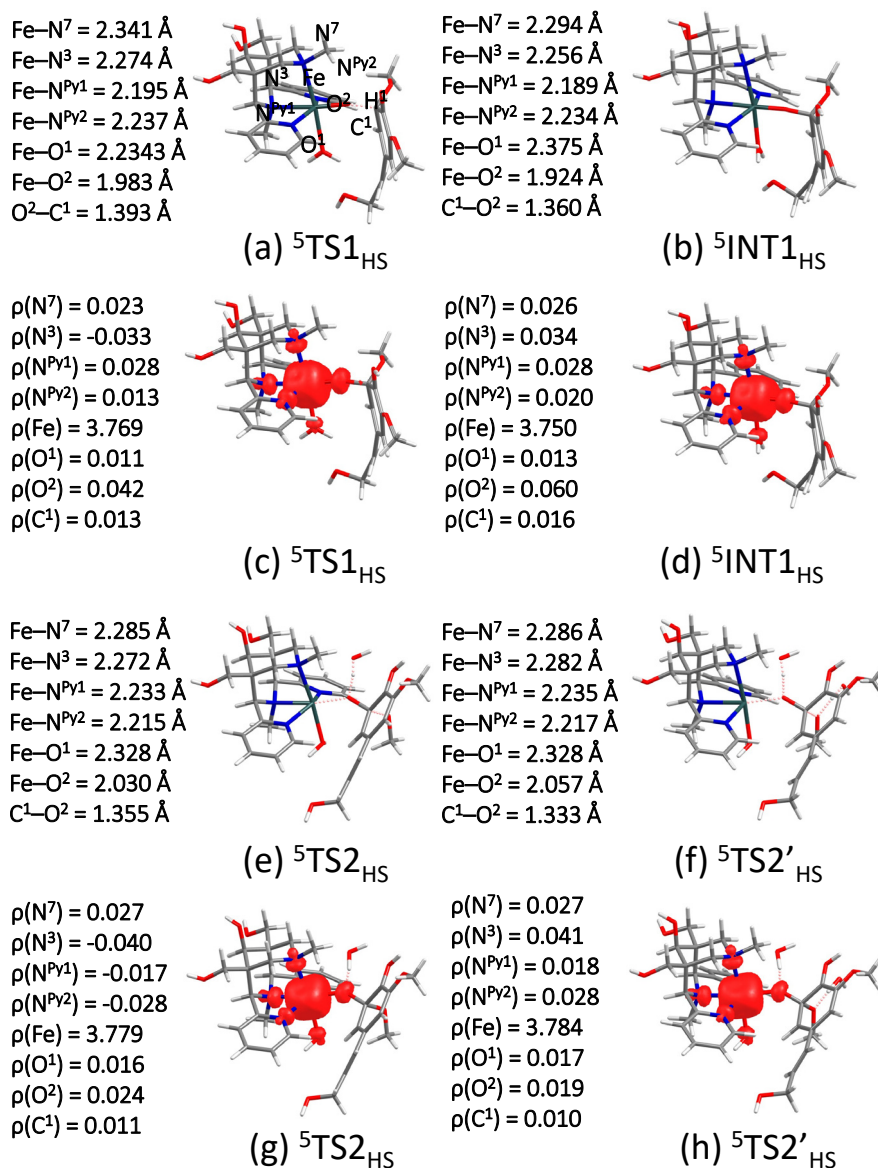

**Fig. S25:** Optimized geometries and spin density plots of demethoxylation mechanism for  $^3\text{TS1}_{\text{HS}}$  (a, c),  $^3\text{INT1}_{\text{HS}}$  (b, d),  $^3\text{TS2}_{\text{HS}}$  (e, g) and  $^3\text{TS2}'_{\text{HS}}$  (f, h).

To simulate an outer-sphere electron transfer mechanism, the formation of a substrate-catalyst complex, also involving HOTf molecules was examined. Initially, the  $\text{Fe}^{\text{IV}}$ -oxido center interacts with two HOTf molecules, forming an  $[(\text{L})\text{Fe}^{\text{IV}}=\text{O}(\text{OH}_2)\dots(\text{HOTf})_2]$  precursor at  $-99\text{kJ/mol}$ . This reacts with a synapyl alcohol substrate molecule to the reactant complex (RC), which is highly stable with an energy of  $-139.5\text{kJ/mol}$ . Spin density values confirm that no electron transfer occurs during the formation of the reactant complex. In the subsequent step, the substrate approaches one of the HOTf molecules, where the close proximity to HOTf enables a PCET in a slightly endothermic step ( $+10.4\text{kJ/mol}$ ). These findings suggest that both HAA and OAT reactions can occur via a PCET mechanism, with the HOTf molecule facilitating electron transfer through proton donation, indicating an outer-sphere electron transfer pathway (Figures S26-S28).

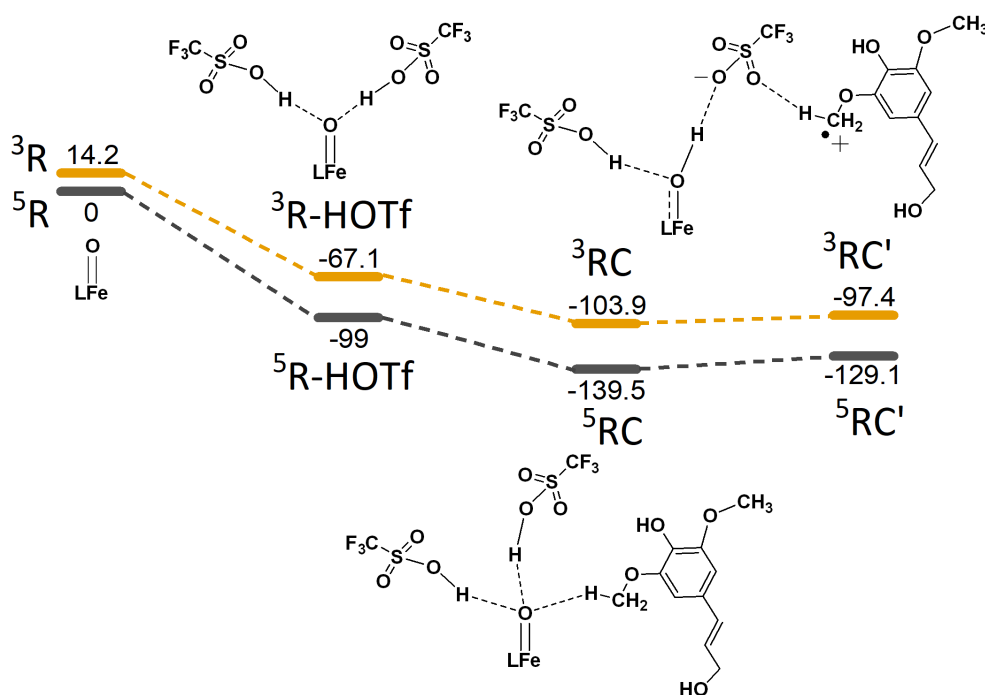

**Fig. S26:** Computed potential energy surface of  $[(\text{L})(\text{OH}_2)\text{Fe}^{\text{IV}}=\text{O}]^{2+}$  forming proton coupled electron transfer reactant complex.

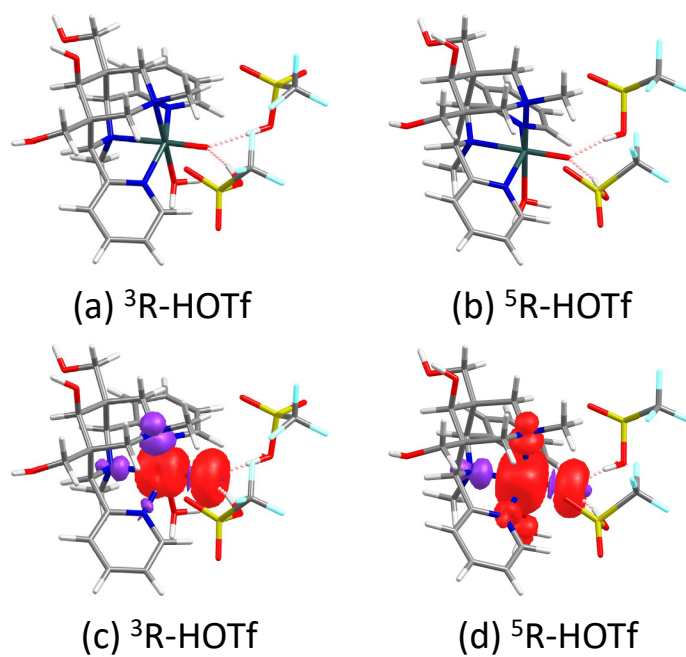

**Fig. S27:** Optimized geometries (a-b) and spin density plots (c-d) of OSET mechanism for  $^3\text{R-HOTf}$  and  $^5\text{R-HOTf}$ .

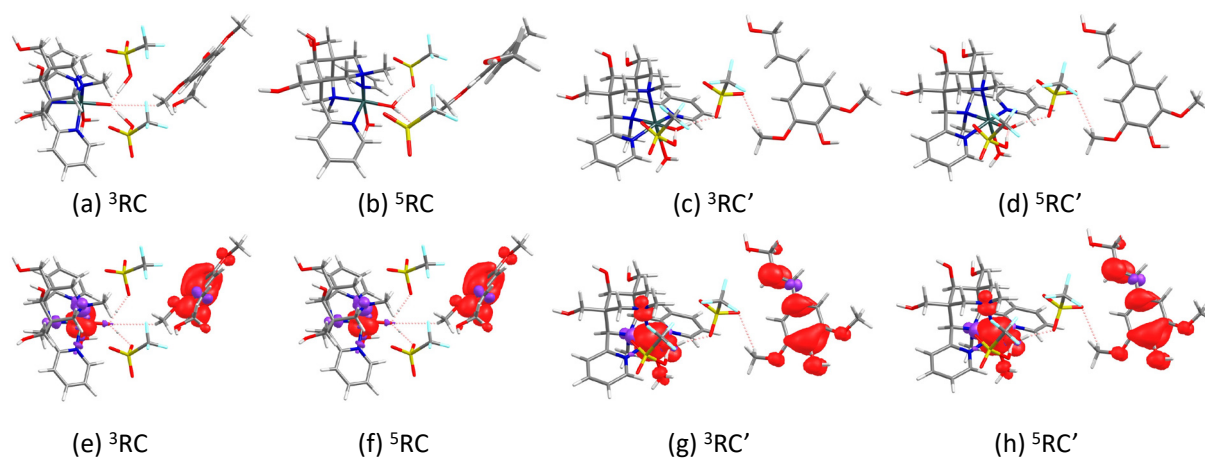

**Fig. S28:** Optimized geometries (a-d) and spin density plots (e-h) of OSET mechanism for  $^3\text{RC}$ ,  $^5\text{RC}$ ,  $^3\text{RC}'$  and  $^5\text{RC}'$ .

## References

1. Hädel, J. *et al.* Natural Abiotic Iron-Oxide-Mediated Formation of C1 and C2 Compounds from Environmentally Important Methyl-Substituted Substrates. *J. Am. Chem. Soc.* **145**, 24590–24602 (2023). [10.1021/jacs.3c06709](https://doi.org/10.1021/jacs.3c06709)
2. Zeisel, S. über ein Verfahren zur quantitativen Nachweise von Methoxyl. *Monatshefte für Chemie* **6**, 989–997; [10.1007/bf01554683](https://doi.org/10.1007/bf01554683) (1885).
3. Page, S. E., Sander, M., Arnold, W. A. & McNeill, K. Hydroxyl radical formation upon oxidation of reduced humic acids by oxygen in the dark. *Environ. Sci. Technol* **46**, 1590–1597; [10.1021/es203836f](https://doi.org/10.1021/es203836f) (2012).
4. Zhang, N. *et al.* Dependence of Biotic and Abiotic H<sub>2</sub>O<sub>2</sub> and •OH Production on the Redox Conditions and Compositions of Sediment during Oxygenation. *Environ. Sci. Technol* **58**, 3849–3857; [10.1021/acs.est.3c10424](https://doi.org/10.1021/acs.est.3c10424) (2024).
5. Page, S. E. *et al.* Dark formation of hydroxyl radical in Arctic soil and surface waters. *Environ. Sci. Technol* **47**, 12860–12867; [10.1021/es4033265](https://doi.org/10.1021/es4033265) (2013).
6. Vermilyea, A. W., Dixon, T. C. & Voelker, B. M. Use of H<sub>2</sub>(<sup>18</sup>)O<sub>2</sub> to measure absolute rates of dark H<sub>2</sub>O<sub>2</sub> production in freshwater systems. *Environ. Sci. Technol* **44**, 3066–3072; [10.1021/es100209h](https://doi.org/10.1021/es100209h) (2010).
7. Schwertmann, U. Solubility and dissolution of iron oxides. *Plant Soil* **130**, 1–25; [10.1007/BF00011851](https://doi.org/10.1007/BF00011851) (1991).
